# Supplementary material for: Diverse and chemoselective sigmatropic shift rearrangements of multisubstituted N,O-diarylhydroxylamines
Source: Royal Society of Chemistry journal article supplement (doi:10.1039/d2ob00771a), 2022-01-01
Supplement: d2ob00771a1.pdf [file d2ob00771a1.pdf]

## Supporting Information

# Diverse and chemoselective sigmatropic shift rearrangements of multisubstituted *N,O*-diarylhydroxylamines

Guangyu Zhang,<sup>a</sup> Simin Sun,<sup>a</sup> Shili Hou\*<sup>b</sup> and Jiayi Xu\*<sup>a</sup>

<sup>a</sup>State Key Laboratory of Chemical Resource Engineering, Department of Organic Chemistry,  
College of Chemistry, Beijing University of Chemical Technology, Beijing 100029, China

Fax/Tel: +86 10 64435565; E-mail: [jxxu@mail.buct.edu.cn](mailto:jxxu@mail.buct.edu.cn)

<sup>b</sup>Guangxi Key Laboratory of Electrochemical and Magnetochemical Functional Materials, College of Chemistry  
and Bioengineering, Guilin University of Technology, Guangxi 541004, China.

## Contents

|                                                   |     |
|---------------------------------------------------|-----|
| Copies of NMR spectra of product <b>1</b> .....   | S2  |
| Copies of NMR spectra of product <b>8</b> .....   | S3  |
| Copies of NMR spectra of products <b>11</b> ..... | S4  |
| Copies of NMR spectra of products <b>3</b> .....  | S8  |
| Copy of NMR spectra of product <b>9</b> .....     | S11 |
| Copies of NMR spectra of product <b>12</b> .....  | S12 |
| Copies of NMR spectra of products <b>16</b> ..... | S14 |
| Copies of NMR spectra of product <b>19</b> .....  | S17 |
| Copies of NMR spectra of product <b>21</b> .....  | S18 |
| Copies of NMR spectra of products <b>25</b> ..... | S19 |
| Control experiments .....                         | S22 |
| DFT calculation .....                             | S27 |

### Copies of NMR spectra of product 1

$^1\text{H}$  NMR (400 MHz) and  $^{13}\text{C}$  NMR (101 MHz) in  $\text{CDCl}_3$

#### *N*-Hydroxy-*N*-mesitylbenzamide (**1**)

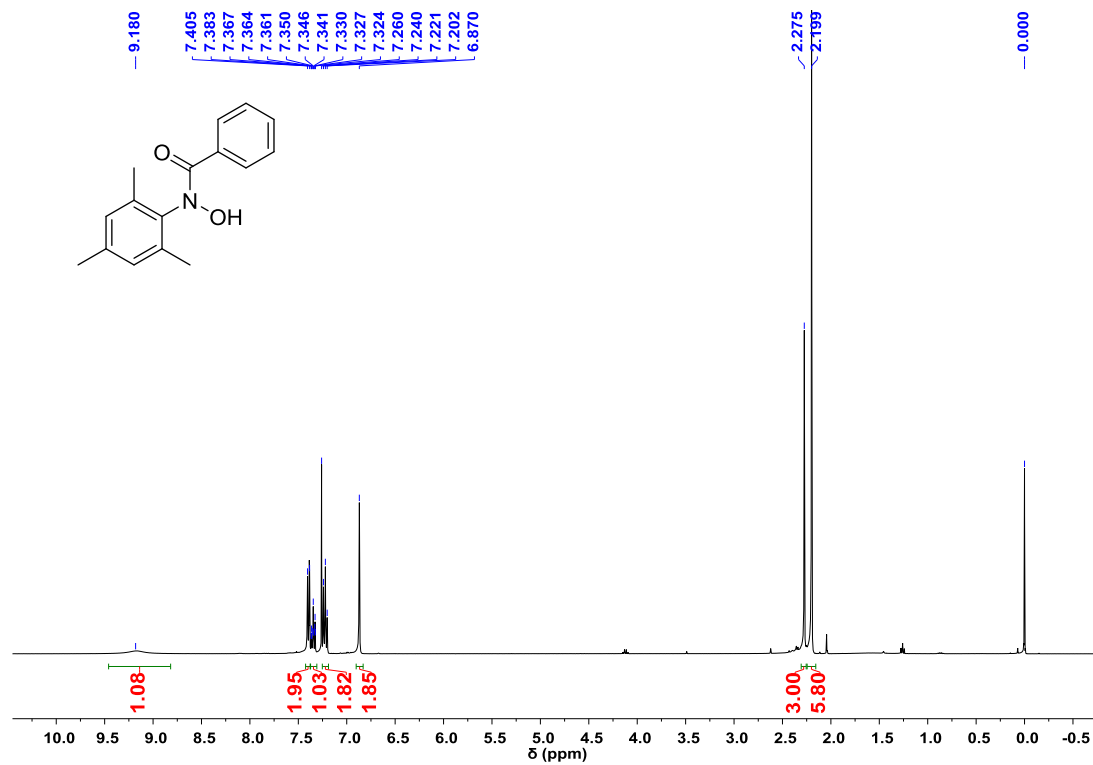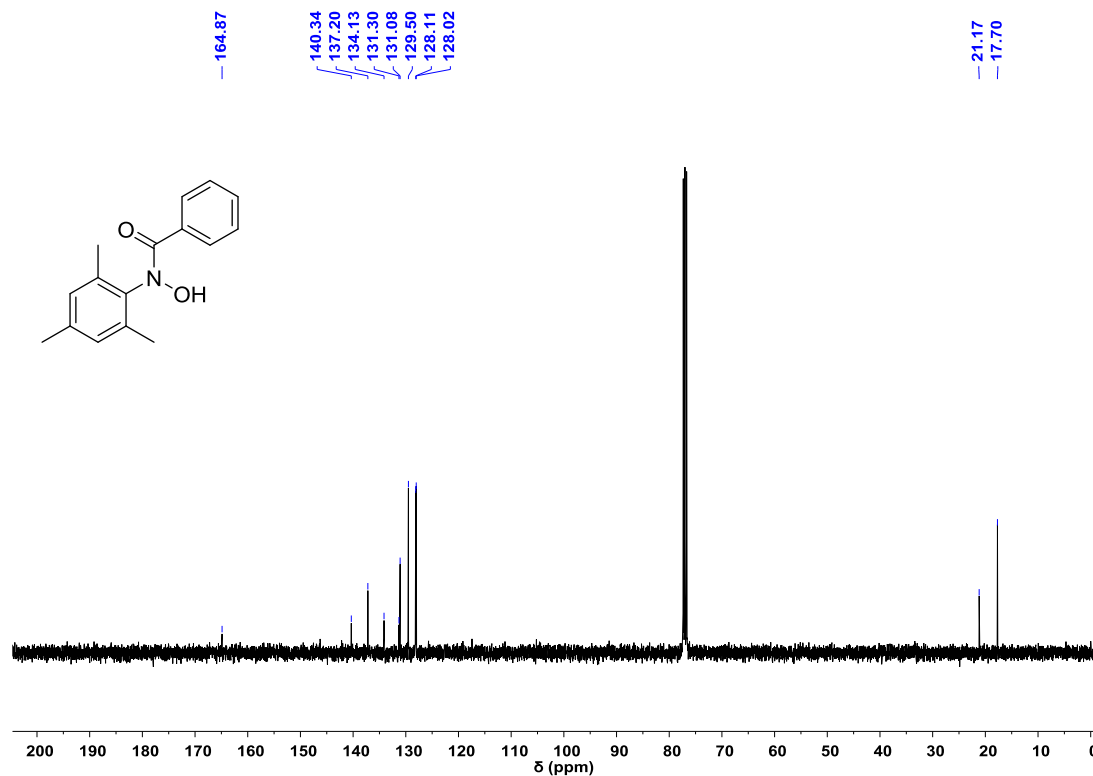

## Copies of NMR spectra of product 8

$^1\text{H}$  NMR (400 MHz) and  $^{13}\text{C}$  NMR (101 MHz) in  $\text{CDCl}_3$

*N*-Hydroxy-*N*-methylbenzamide (**8**)

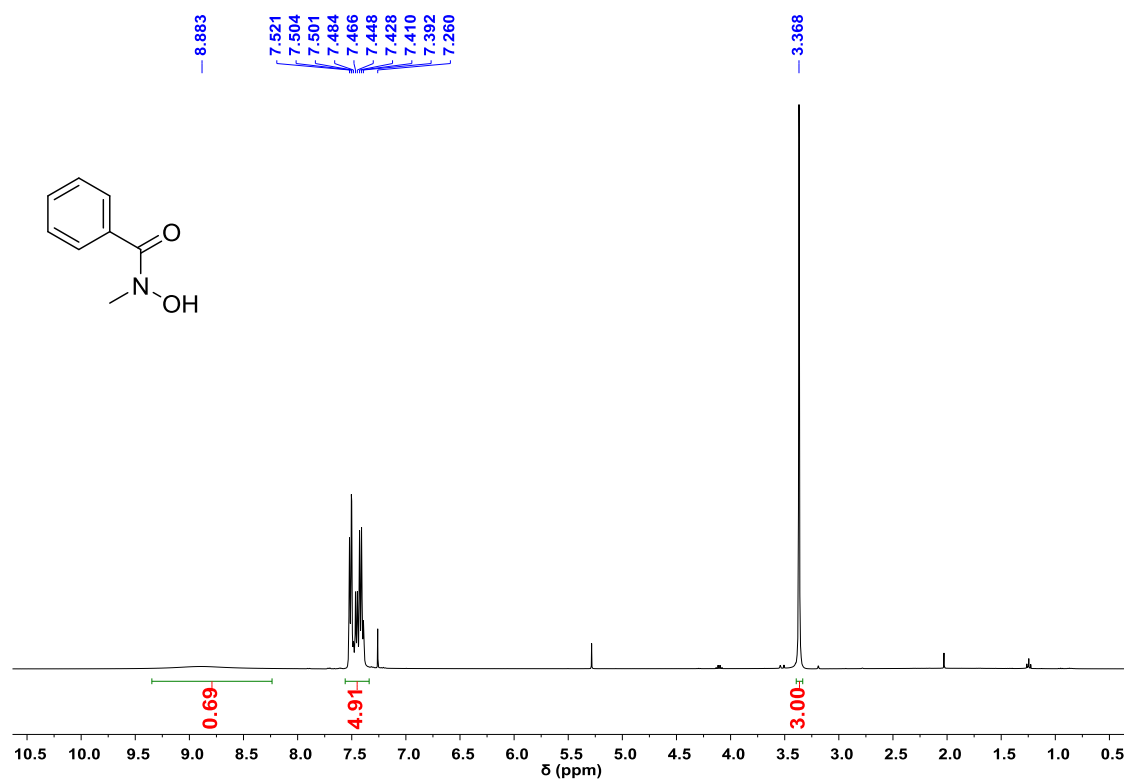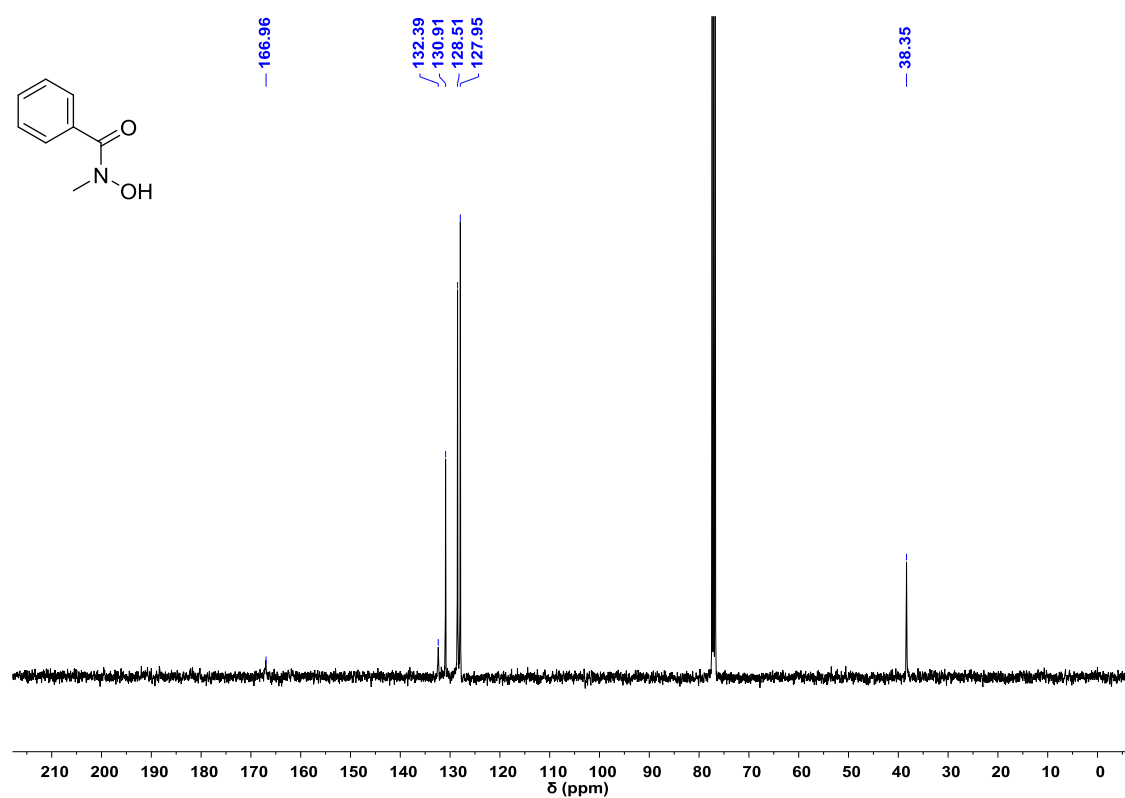

### Copies of NMR spectra of products 11

$^1\text{H}$  NMR (400 MHz) and  $^{13}\text{C}$  NMR (101 MHz) in  $\text{CDCl}_3$

*N*-(3,5-Dimethylphenyl)-*N*-hydroxybenzamide (**11e**)

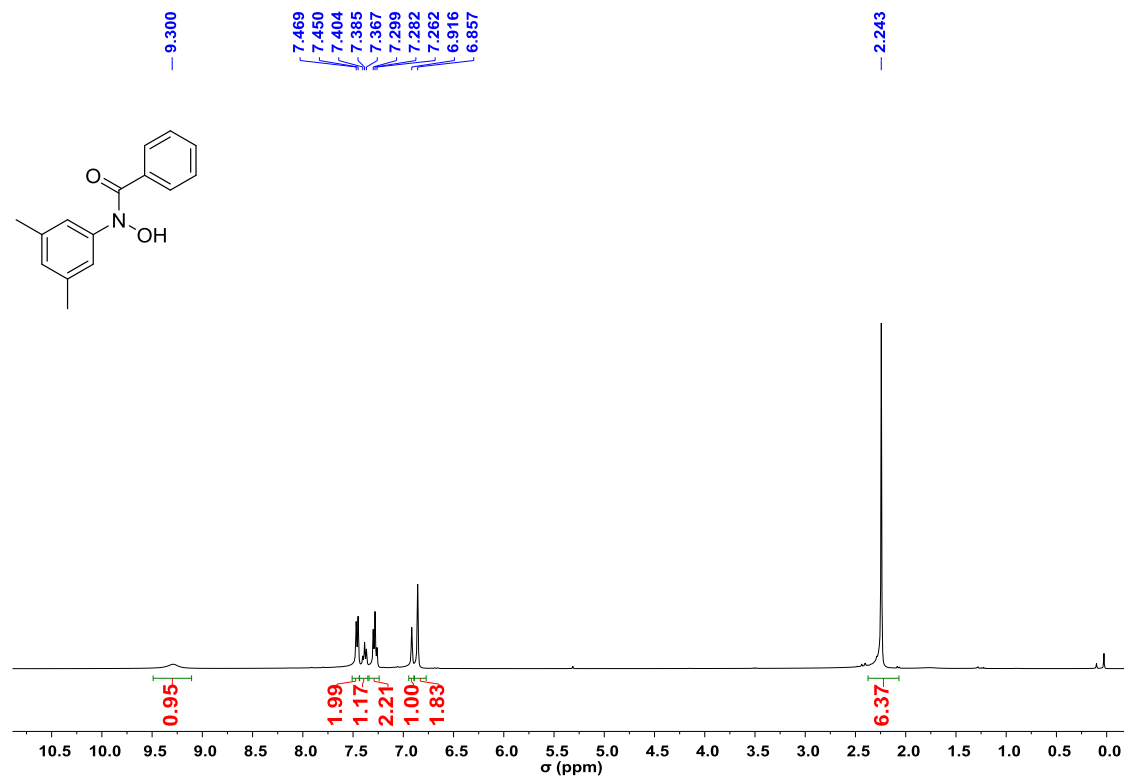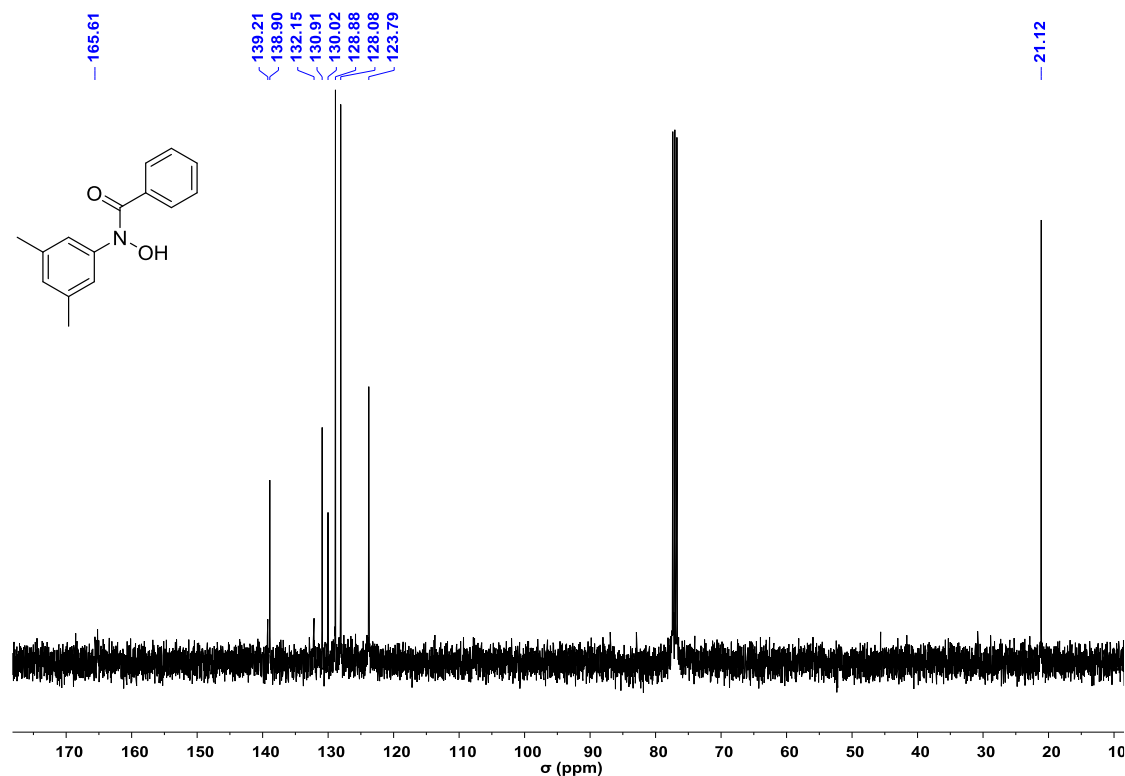

*N*-hydroxy-*N*-(*p*-tolyl)acetamide (**11g**)

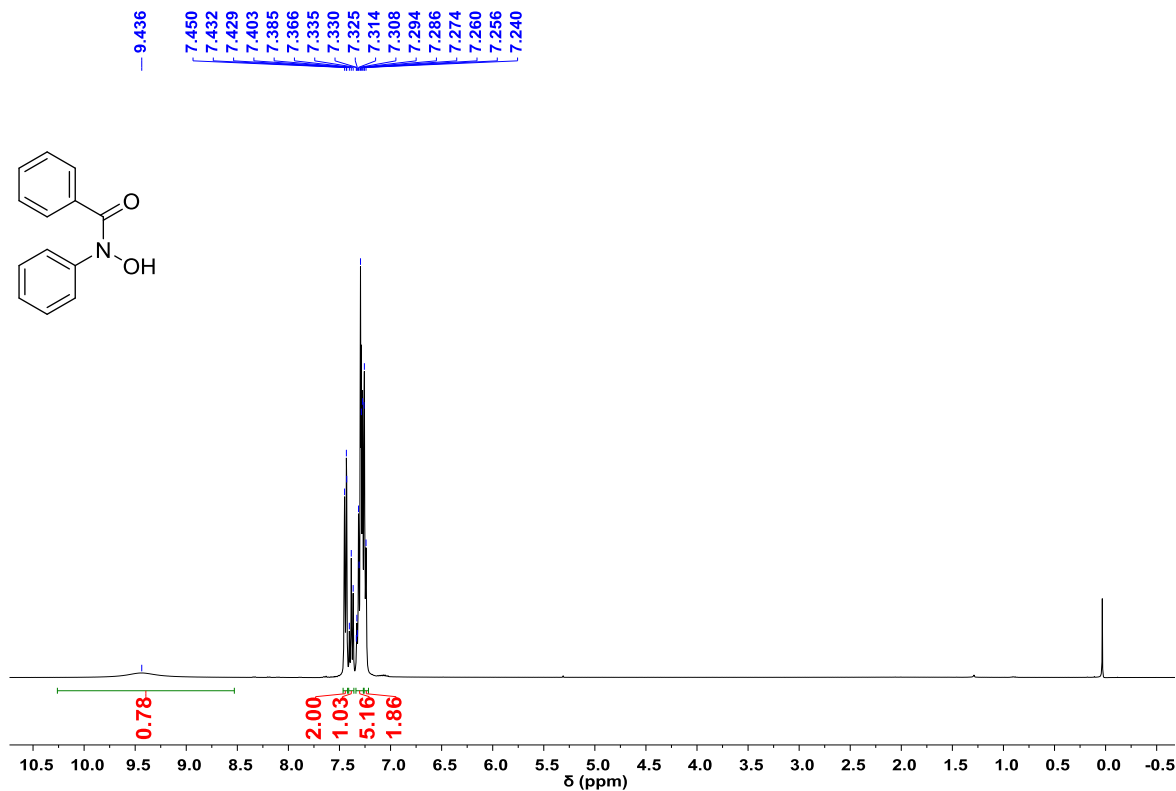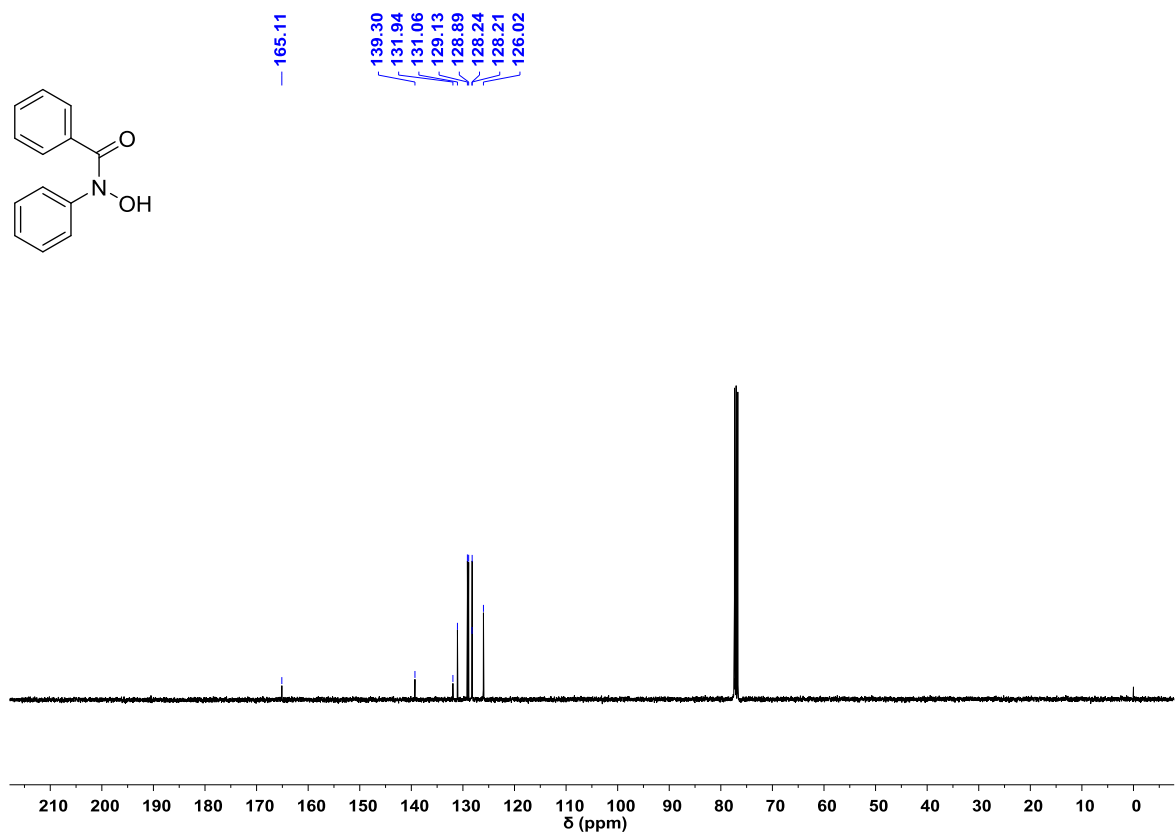

### *N*-(2-Chlorophenyl)-*N*-hydroxybenzamide (**11h**)

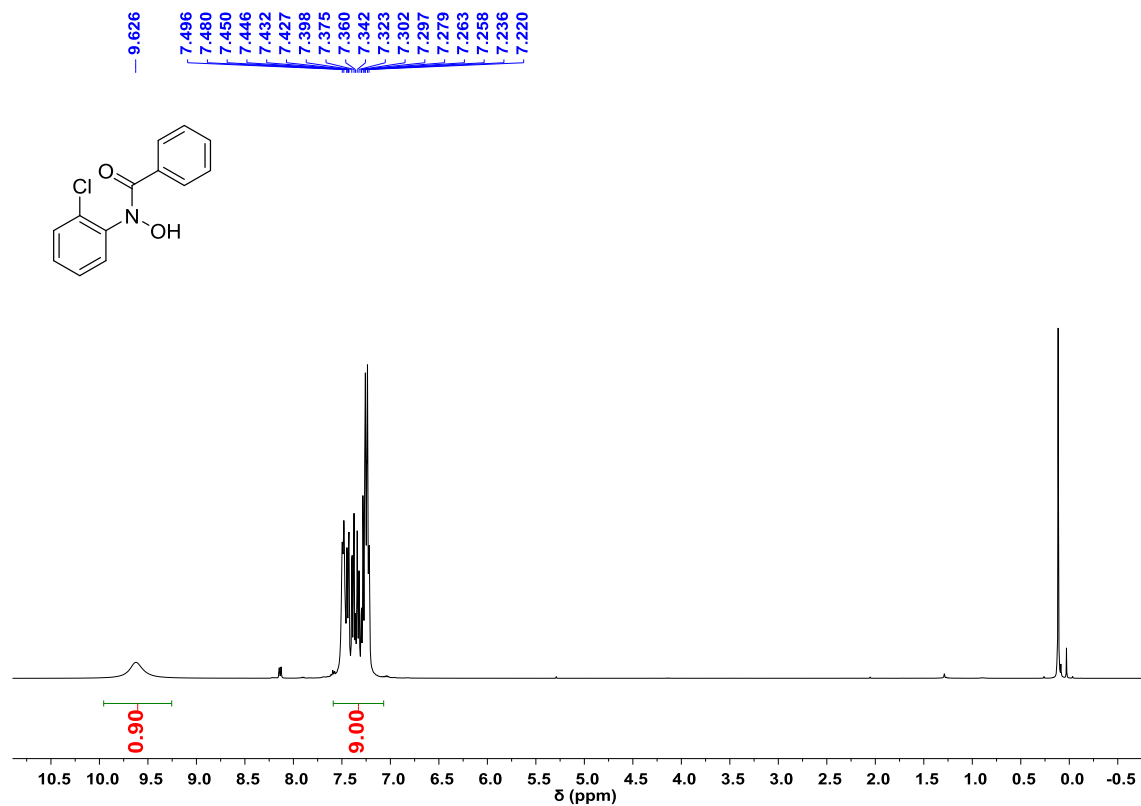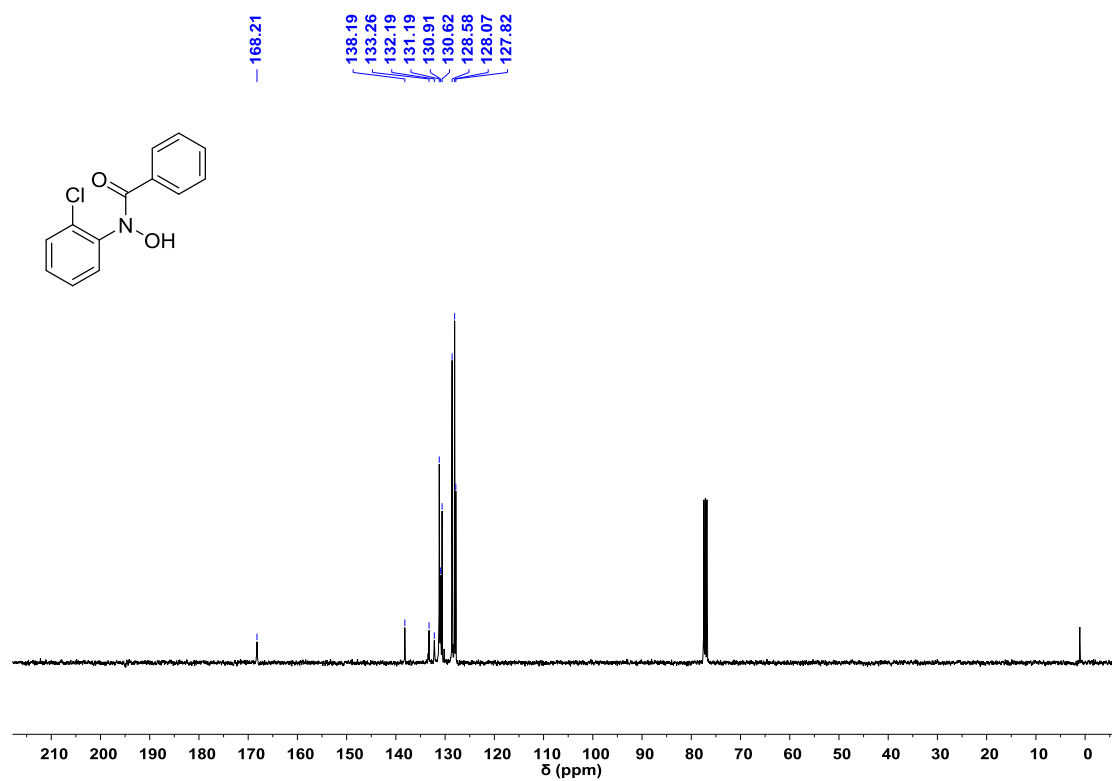

### *N*-Hydroxy-*N*-phenylacetamide (**11i**)

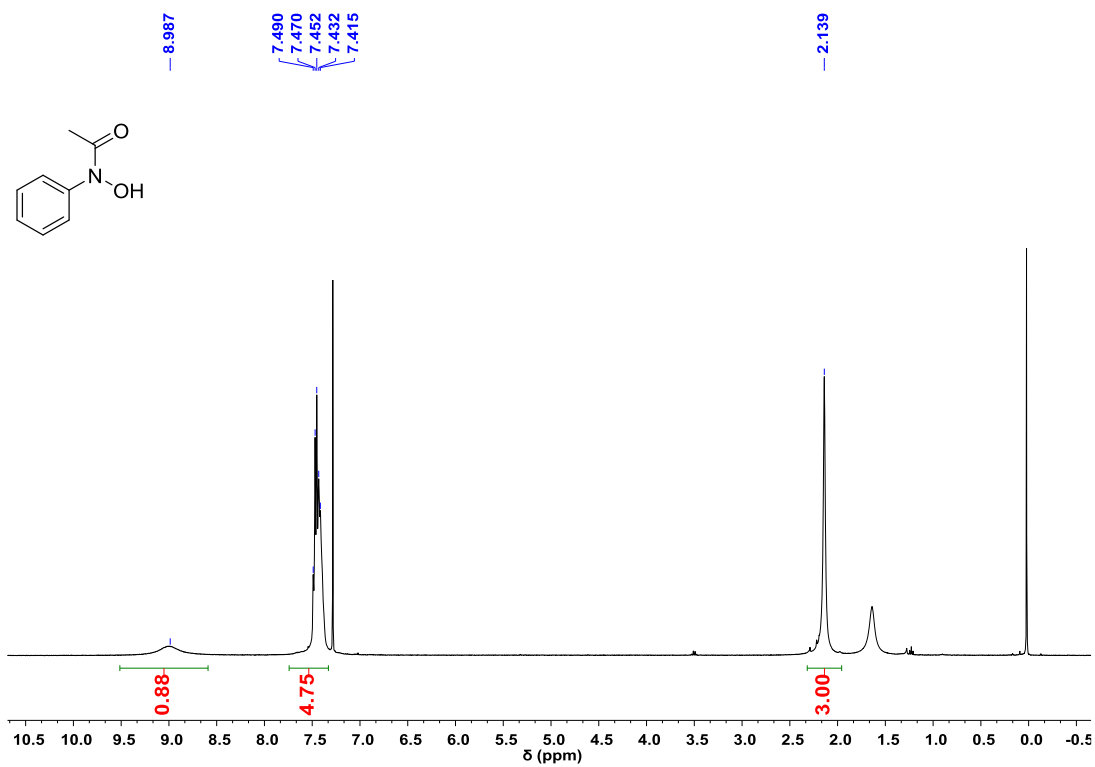

### Copies of NMR spectra of products 3

$^1\text{H}$  NMR (400 MHz) and  $^{13}\text{C}$  NMR (101 MHz) in  $\text{DMSO-}d_6$

*N*-(2,4,9b-Trimethyl-8-nitrodibenzo[*b,d*]furan-4a(9*bH*)-yl)benzamide (**3a**)

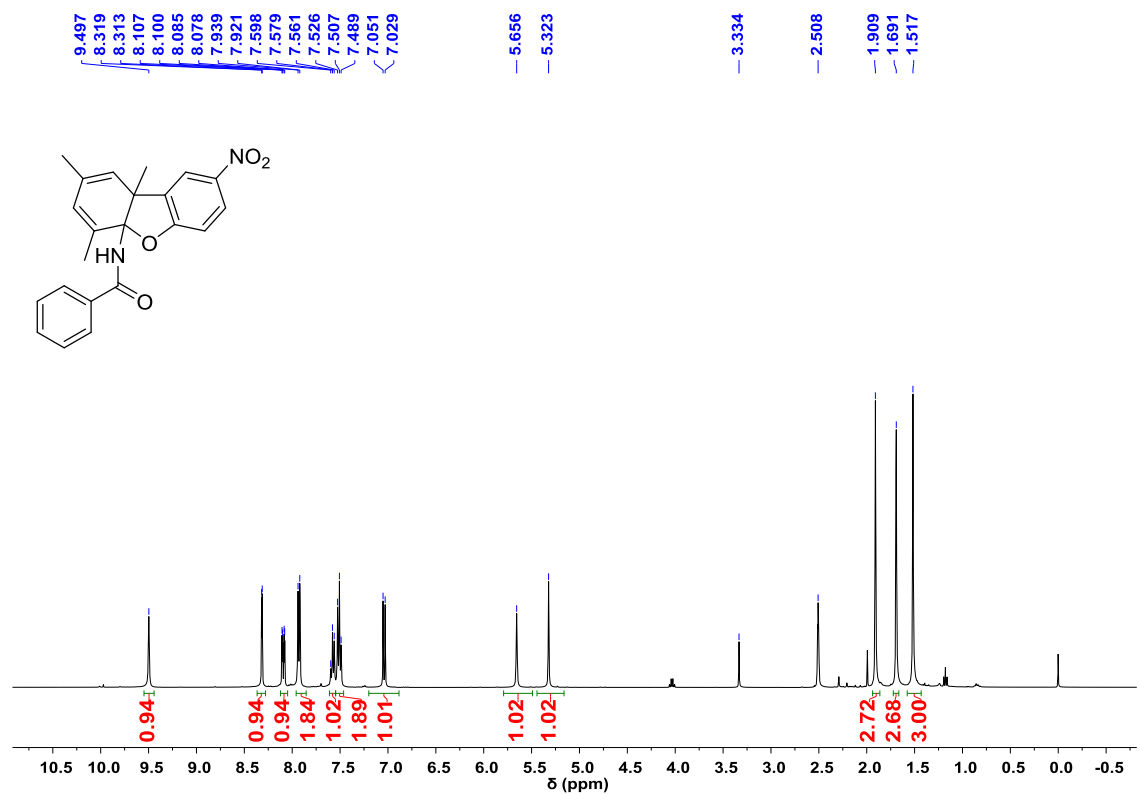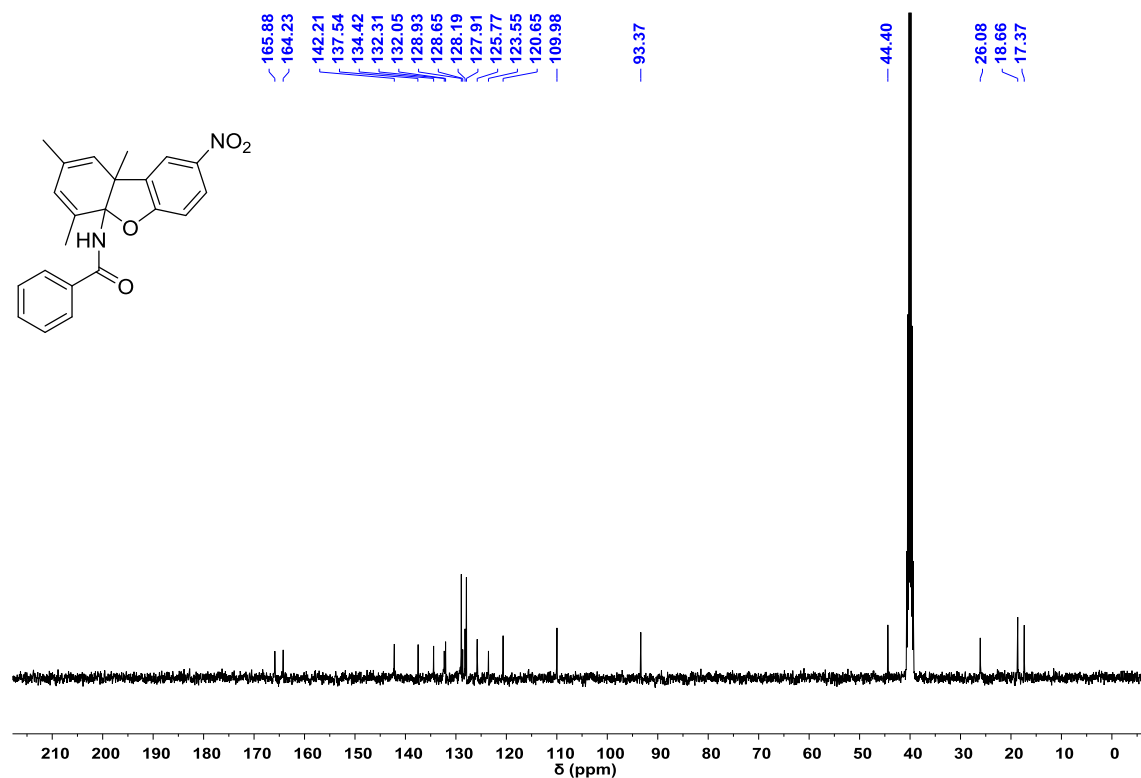



$^1\text{H}$  NMR (400 MHz) and  $^{13}\text{C}$  NMR (101 MHz) in  $\text{CDCl}_3$

*N*-(8-Cyano-2,4,9b-trimethyldibenzo[*b,d*]furan-4a(9*bH*)-yl)benzamide (**3c**)

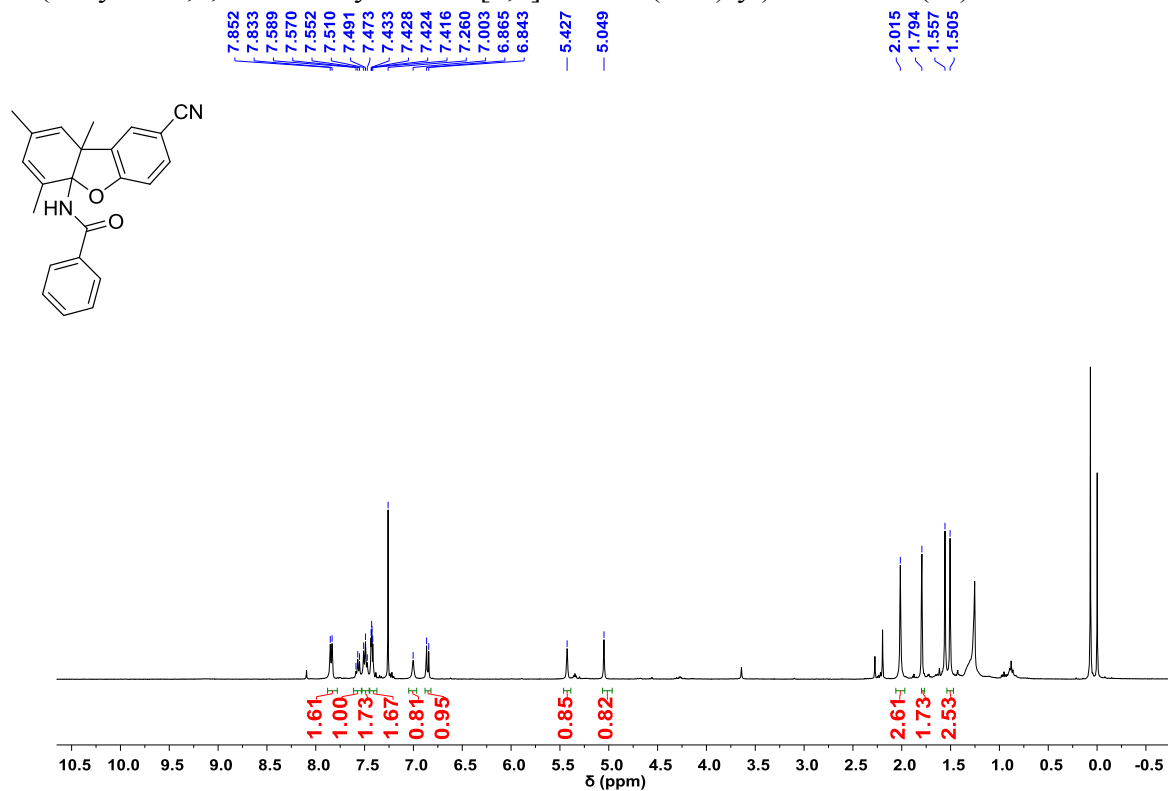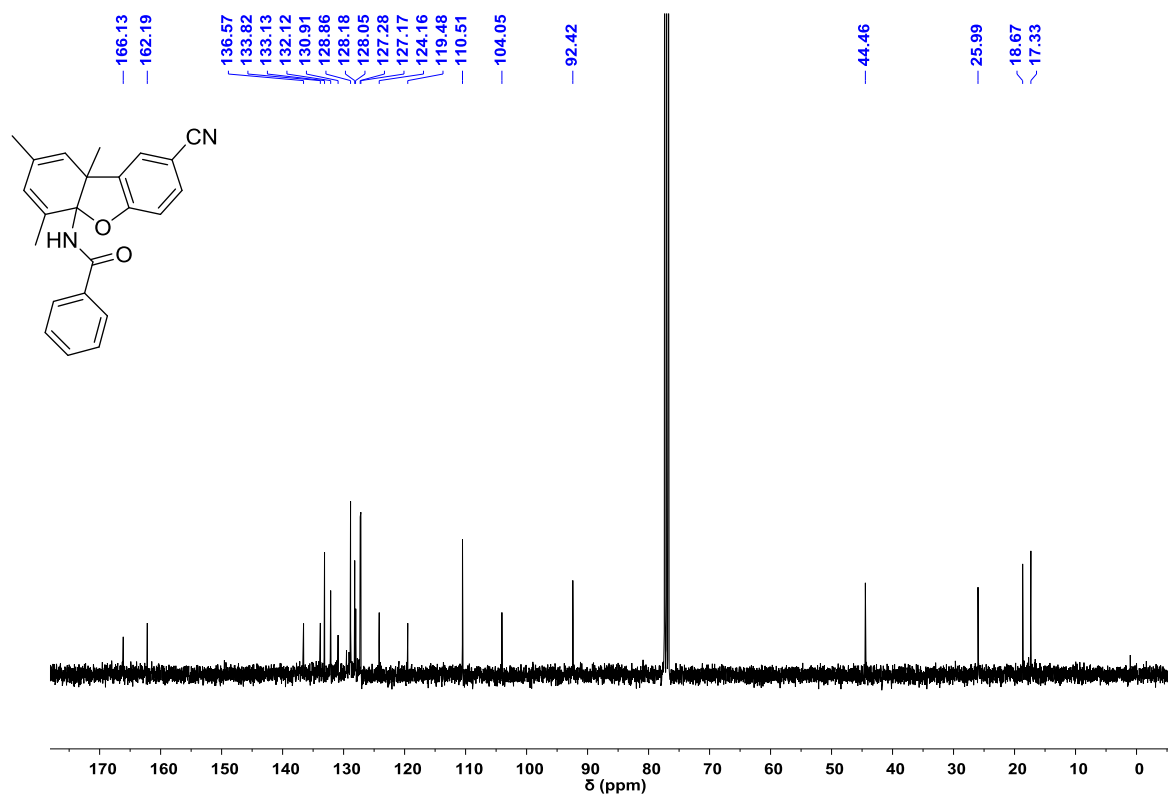

$^1\text{H}$  NMR (400 MHz) and  $^{13}\text{C}$  NMR (101 MHz) in  $\text{DMSO-}d_6$

*N*-(8-Cyano-2,4,9b-trimethyl-6-nitrodibenzo[*b,d*]furan-4a(9*bH*)-yl)benzamide (**3d**)

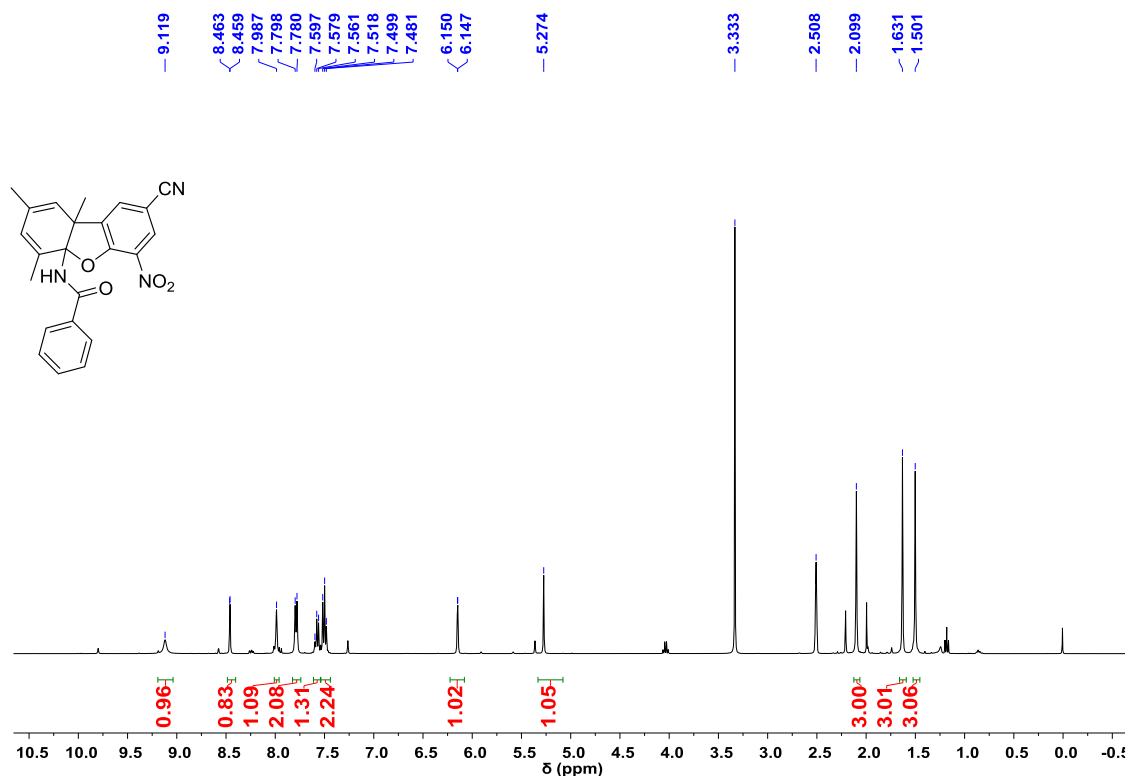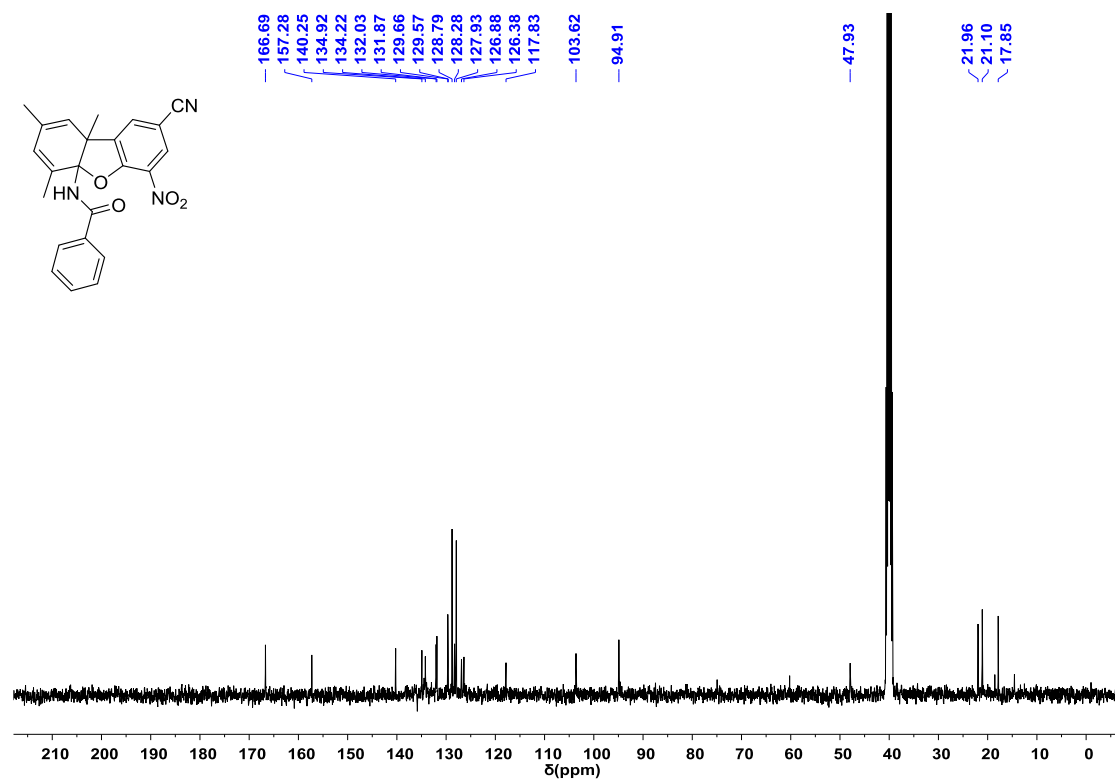

### Copy of NMR spectra of product 9

$^1\text{H}$  NMR (400 MHz) in  $\text{CDCl}_3$

*N*-(2,4-Dinitrophenoxy)-*N*-methylbenzamide (**9**)

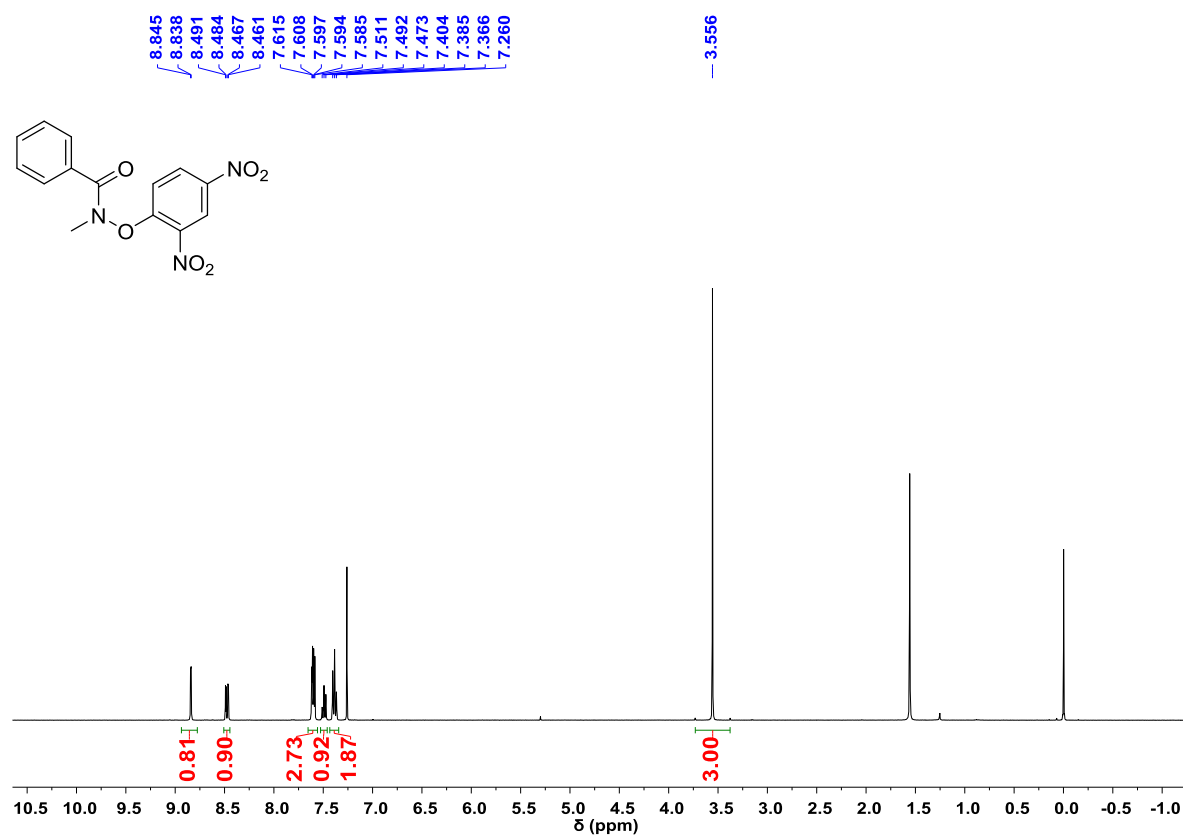

### Copies of NMR spectra of product 12

$^1\text{H}$  NMR (400 MHz) and  $^{13}\text{C}$  NMR (101 MHz) in  $\text{CDCl}_3$

2-((2,6-Dinitro-4-(trifluoromethyl)phenyl)amino)-4,6-dimethylphenyl benzoate (**12eg**)

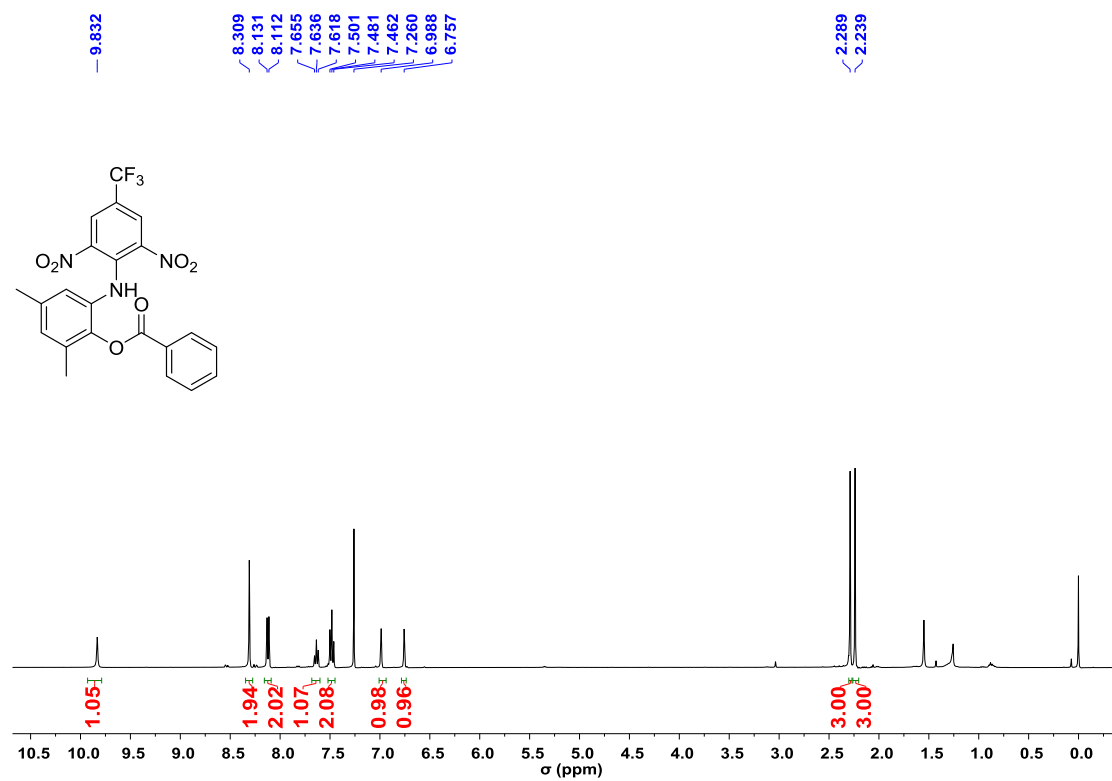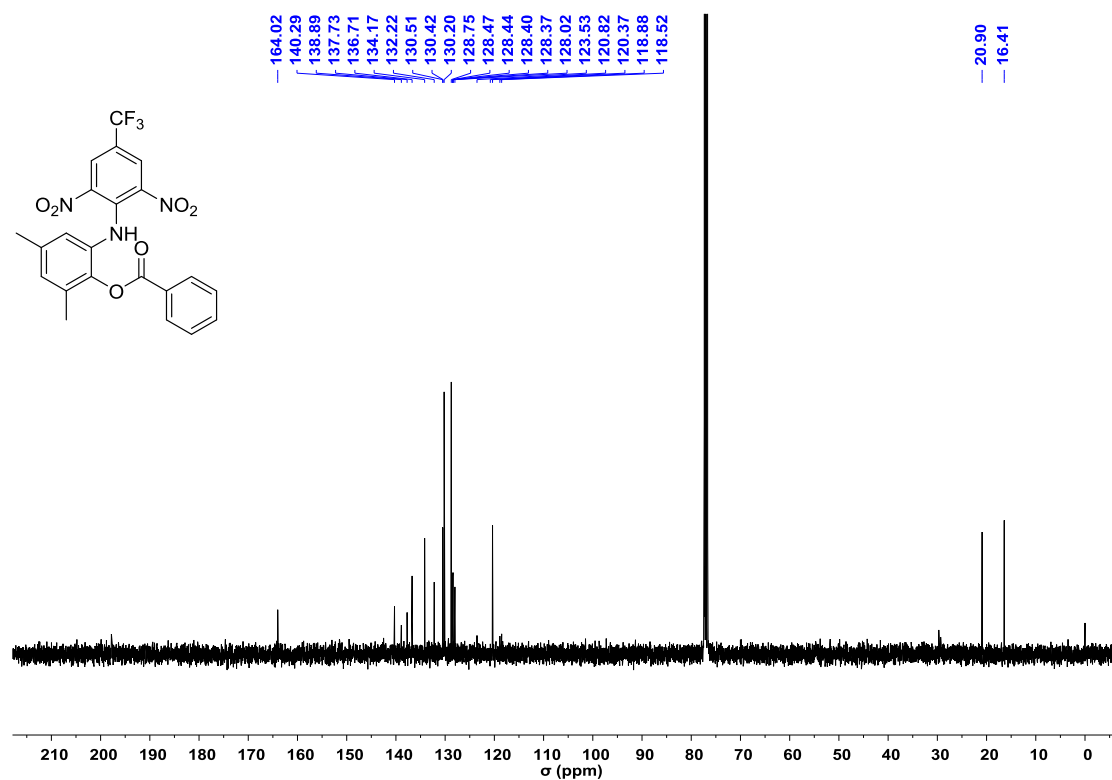

$^{19}\text{F}$  NMR (376 MHz) in  $\text{CDCl}_3$

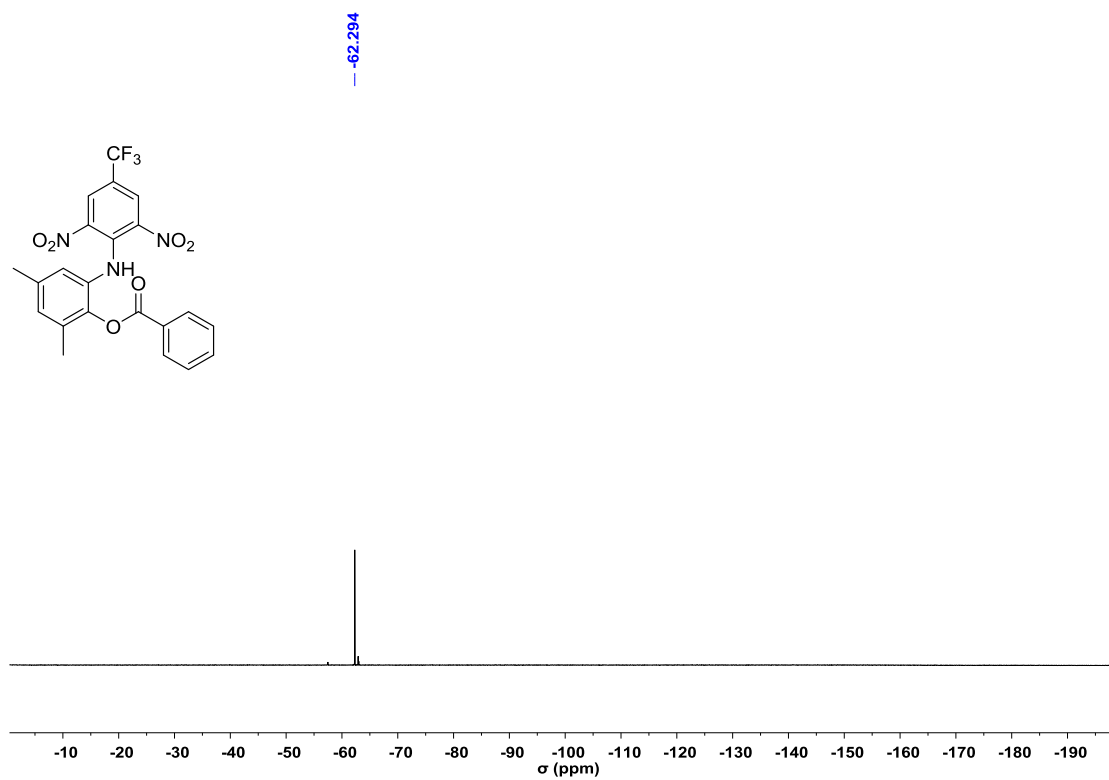

## Copies of NMR spectra of products 16

$^1\text{H}$  NMR (400 MHz) and  $^{13}\text{C}$  NMR (101 MHz) in  $\text{DMSO-}d_6$

*N*-(4-(2,4,6-Trinitrophenoxy)phenyl)benzamide (**16a**)

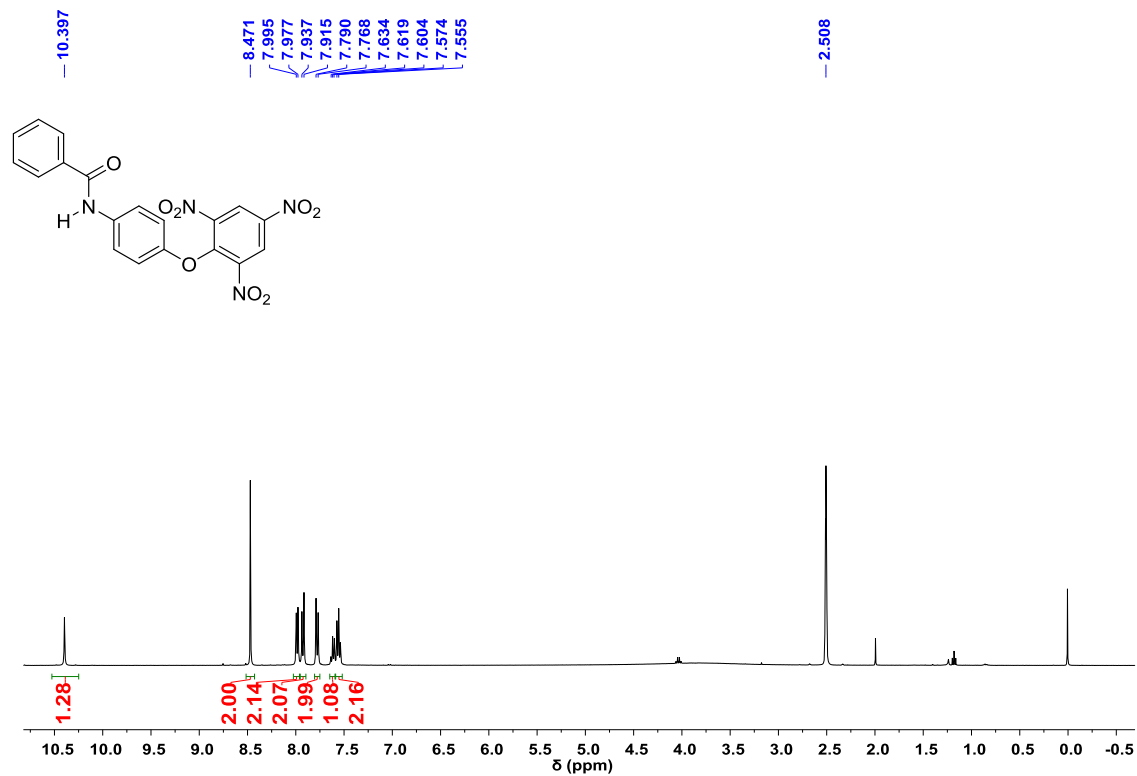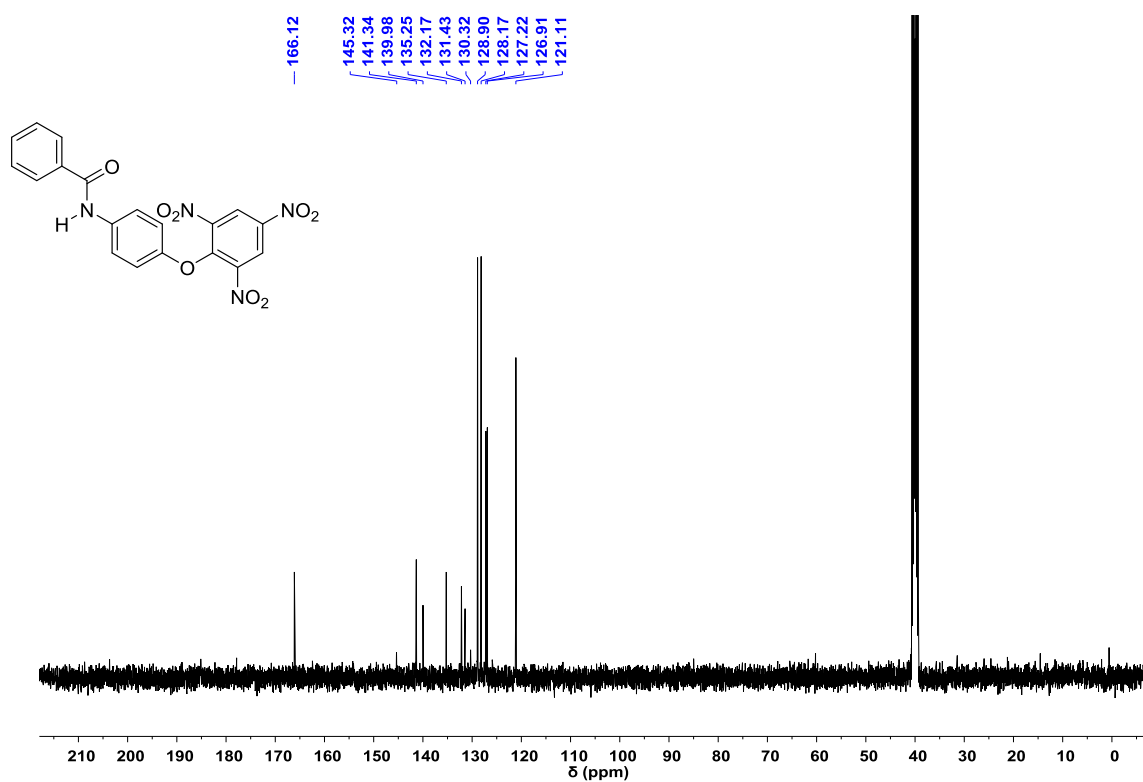

*N*-(2-Chloro-4-(2,4,6-trinitrophenoxy)phenyl)benzamide (**16b**)

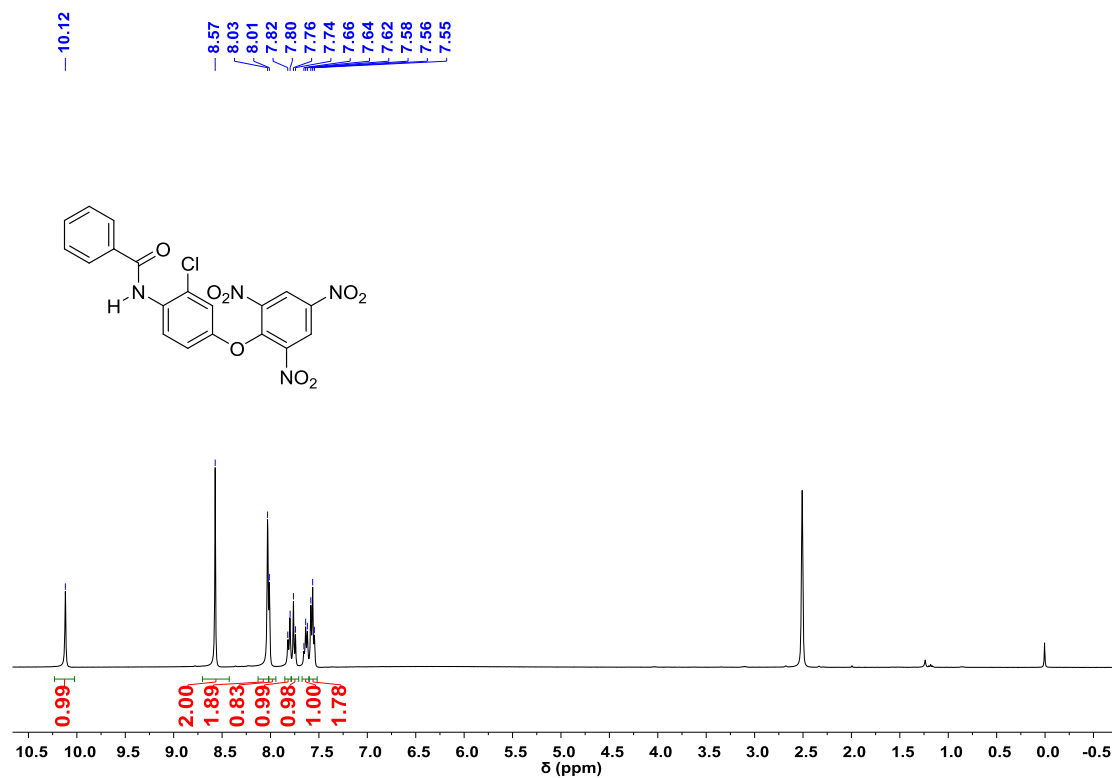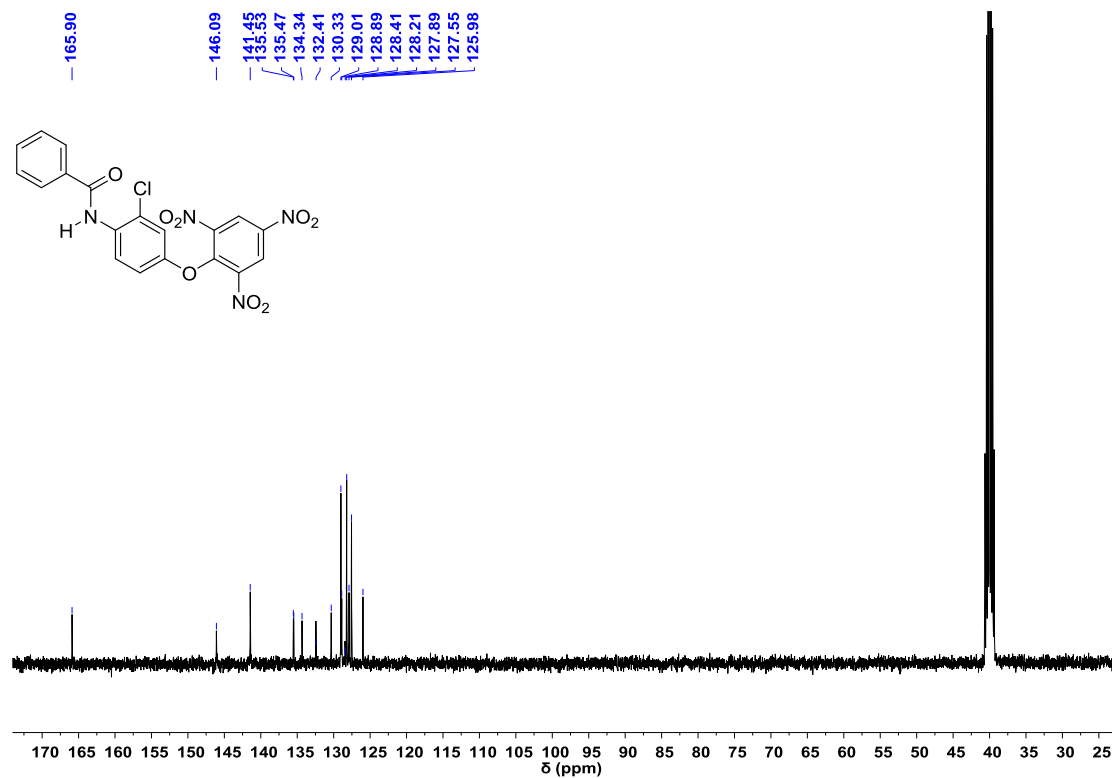

*N*-(4-(2,4,6-Trinitrophenoxy)phenyl)acetamide (**16c**)

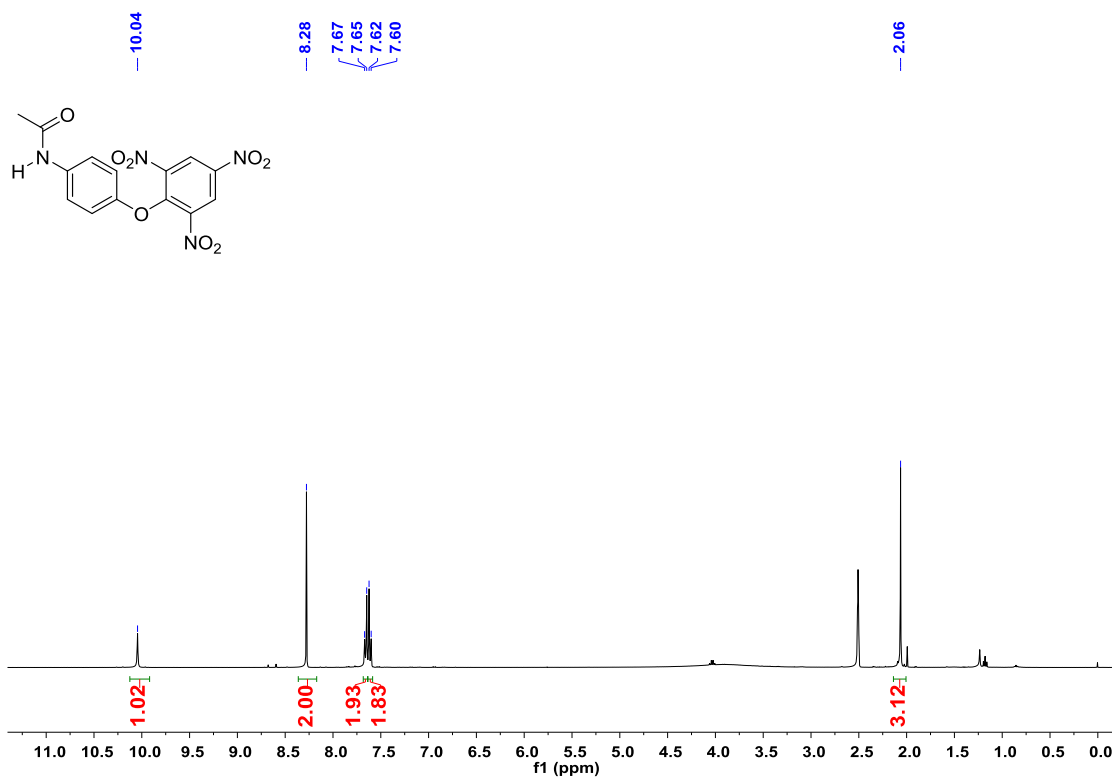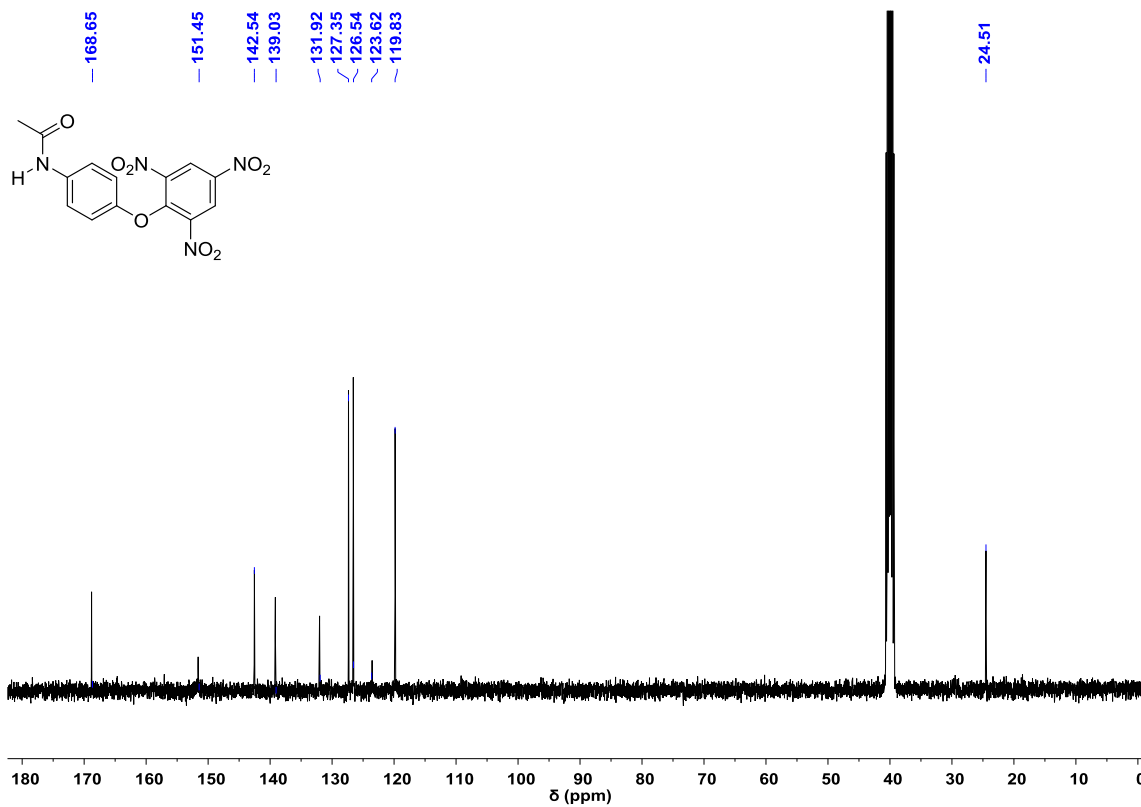



### Copies of NMR spectra of product 19

$^1\text{H}$  NMR (400 MHz) and  $^{13}\text{C}$  NMR (101 MHz) in  $\text{CDCl}_3$

*N*-(1',3',5,5'-Tetramethyl-2'-oxo-1',2'-dihydro-[1,1'-biphenyl]-2-yl)acetamide (**19**)

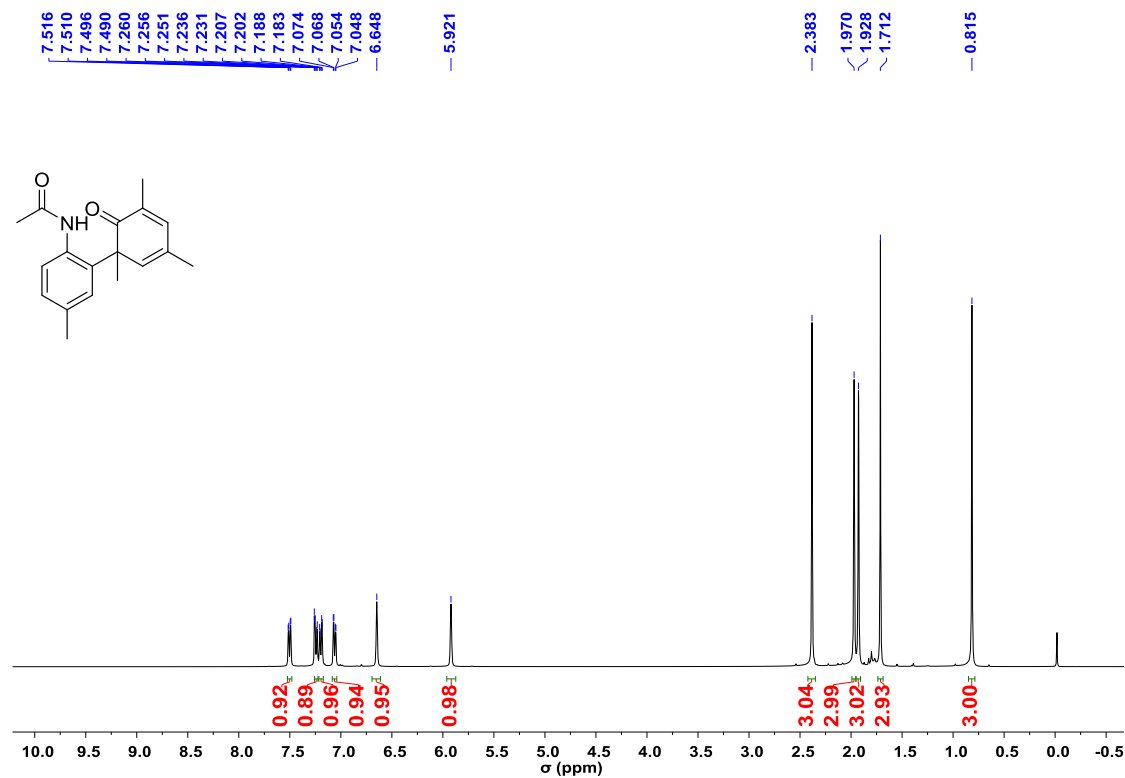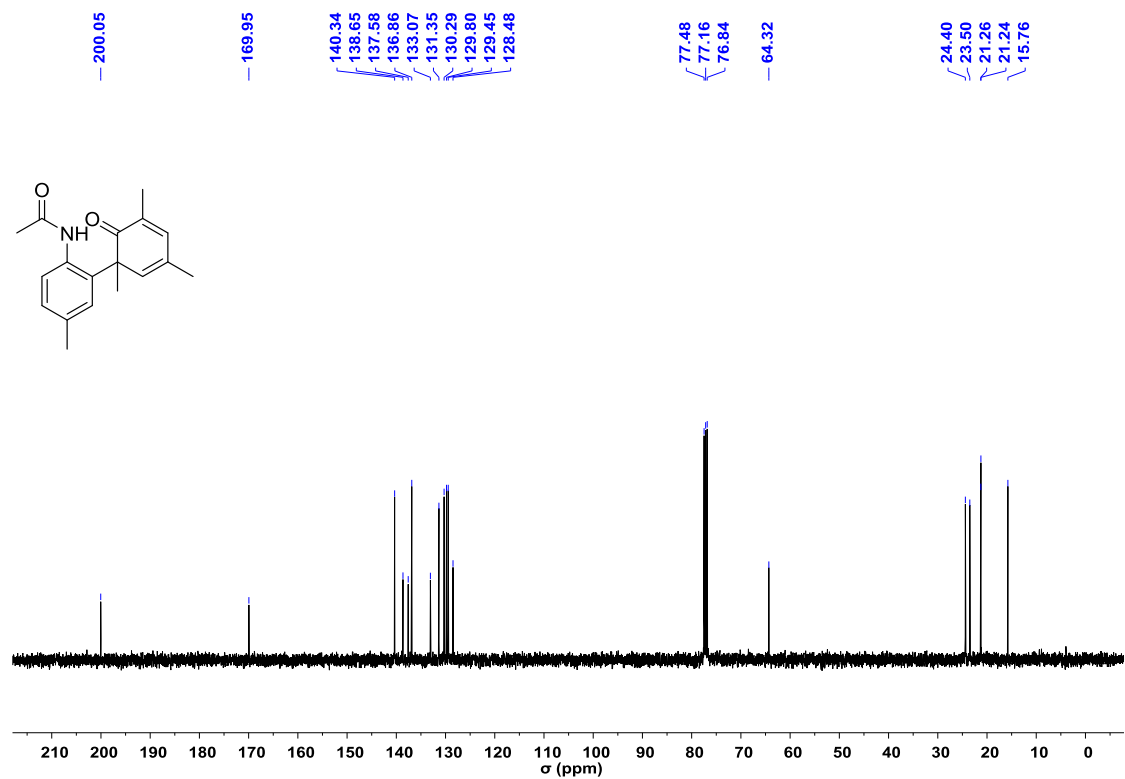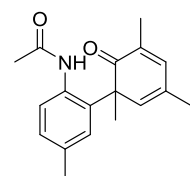

## Copies of NMR spectra of product 21

$^1\text{H}$  NMR (400 MHz) and  $^{13}\text{C}$  NMR (101 MHz) in  $\text{CDCl}_3$

### *N*-Methoxy-*N*-phenylbenzamide (**21**)

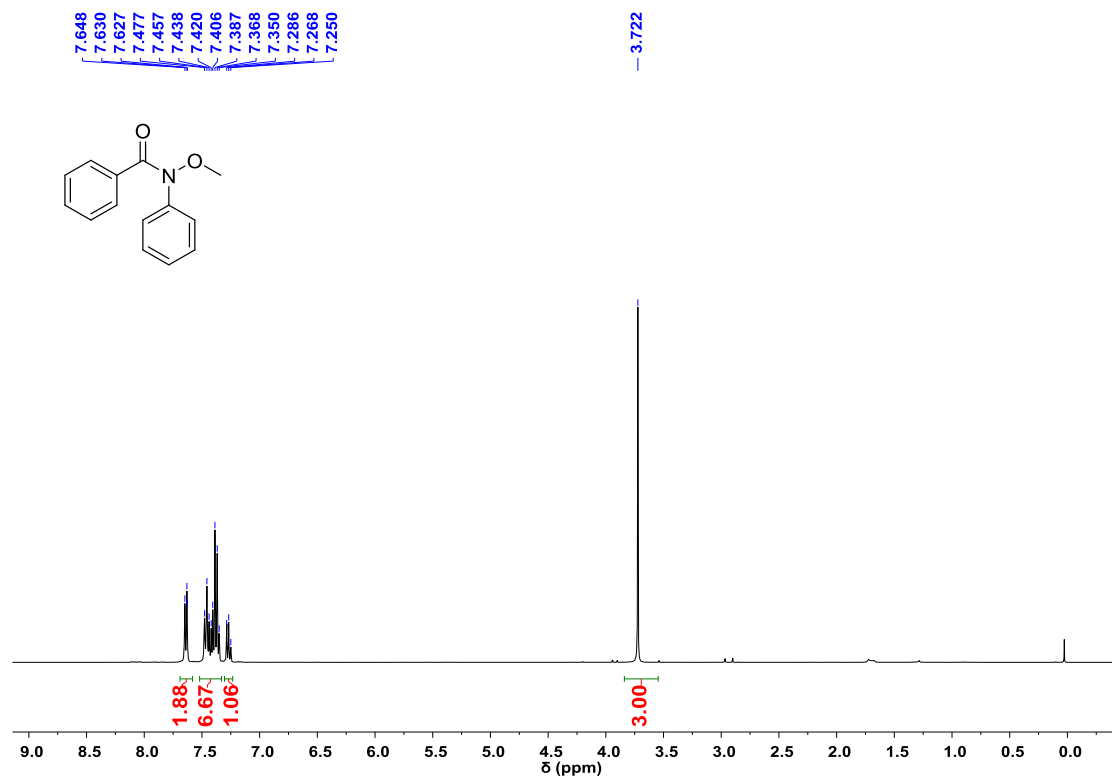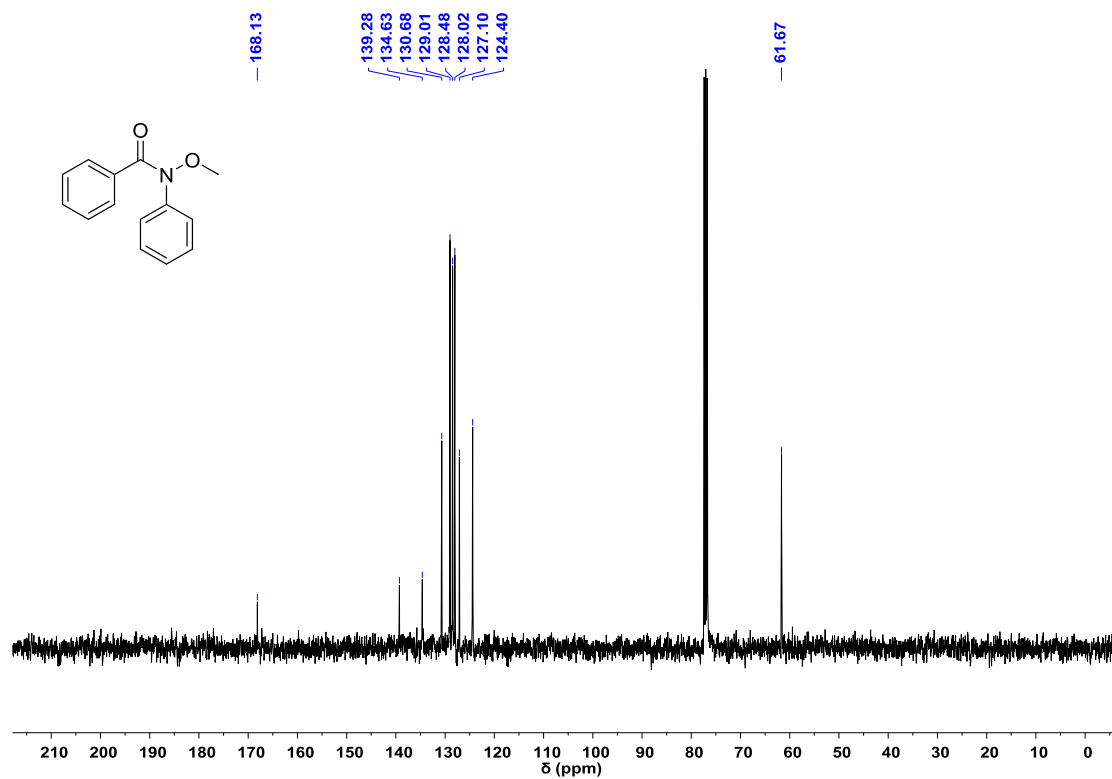

### Copies of NMR spectra of products 25

<sup>1</sup>H NMR (400 MHz) and <sup>13</sup>C NMR (101 MHz) in DMSO-*d*<sub>6</sub>

*N*-(4'-Hydroxy-5-methyl-3',5'-dinitro-[1,1'-biphenyl]-2-yl)benzamide (**25a**)

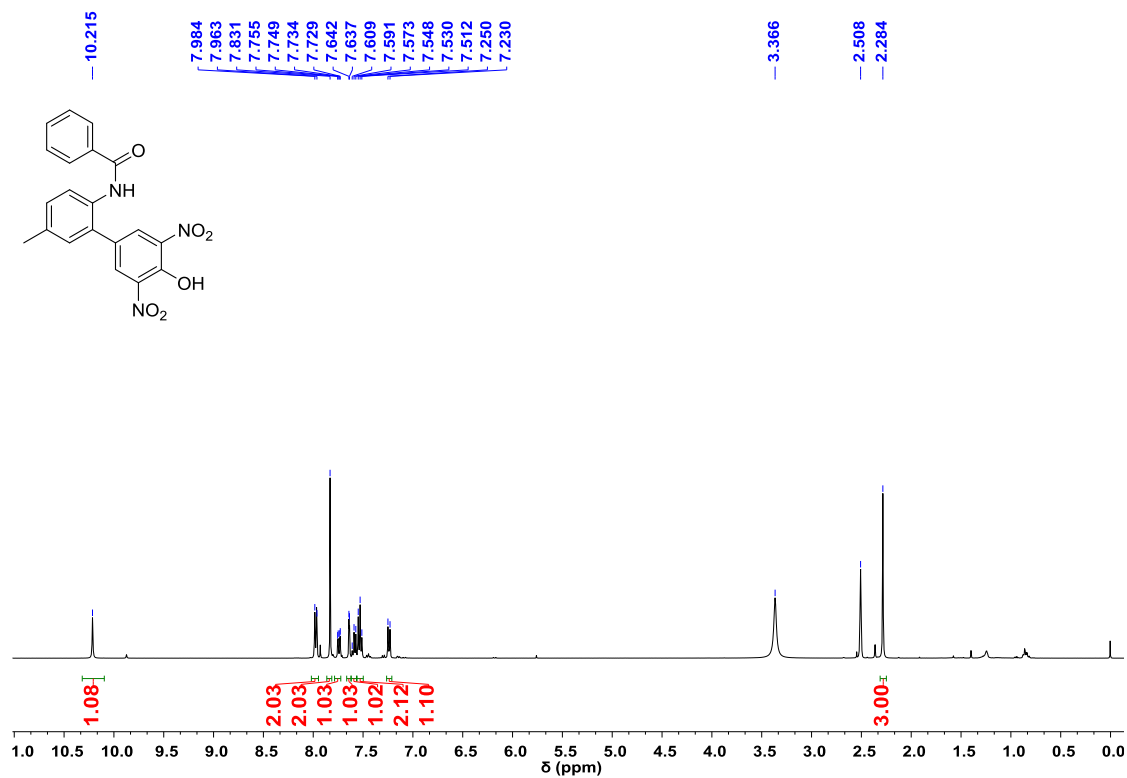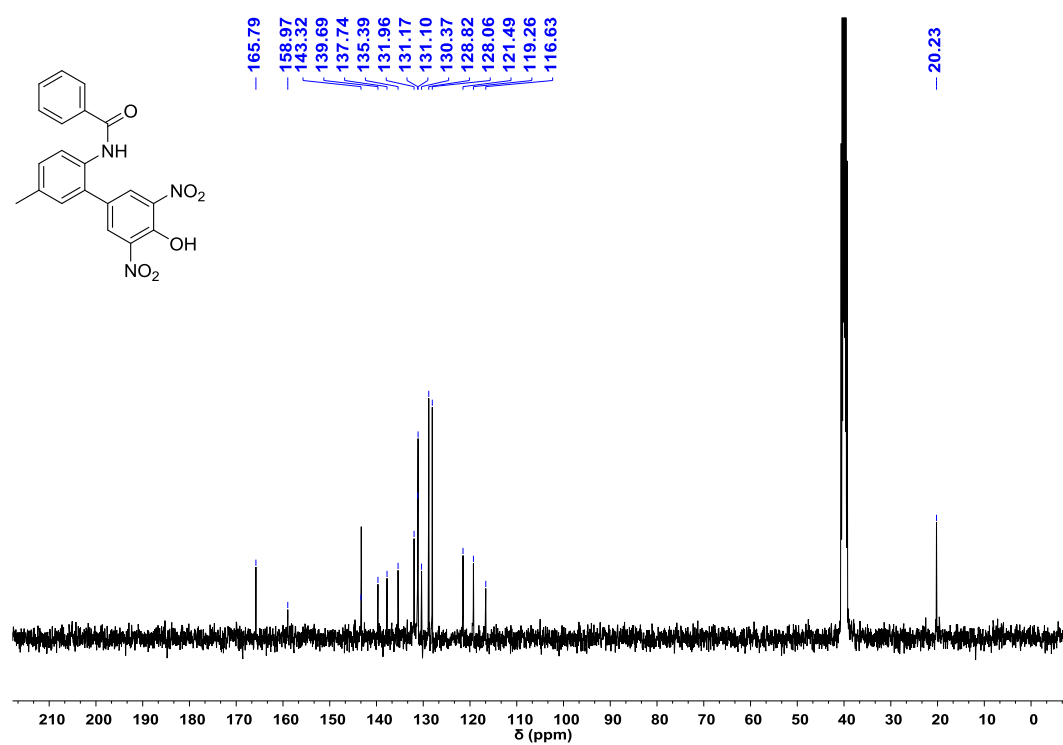

*N*-(4'-Hydroxy-5-methyl-3',5'-dinitro-[1,1'-biphenyl]-2-yl)acetamide (**25b**)

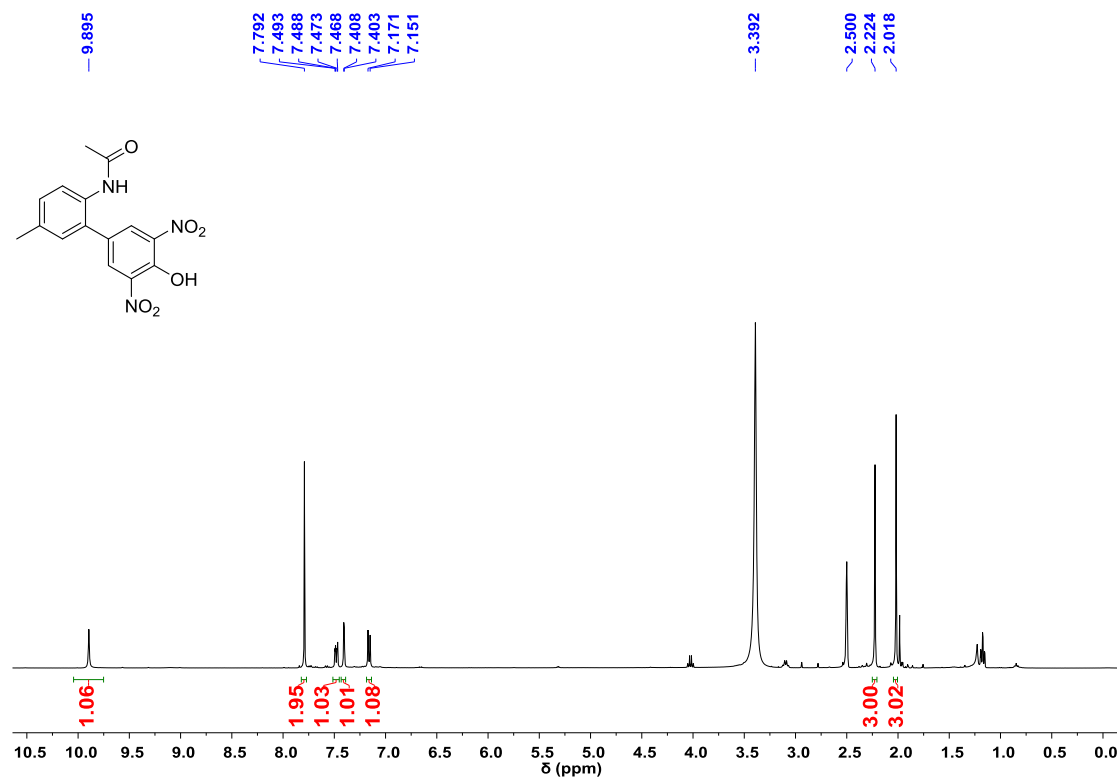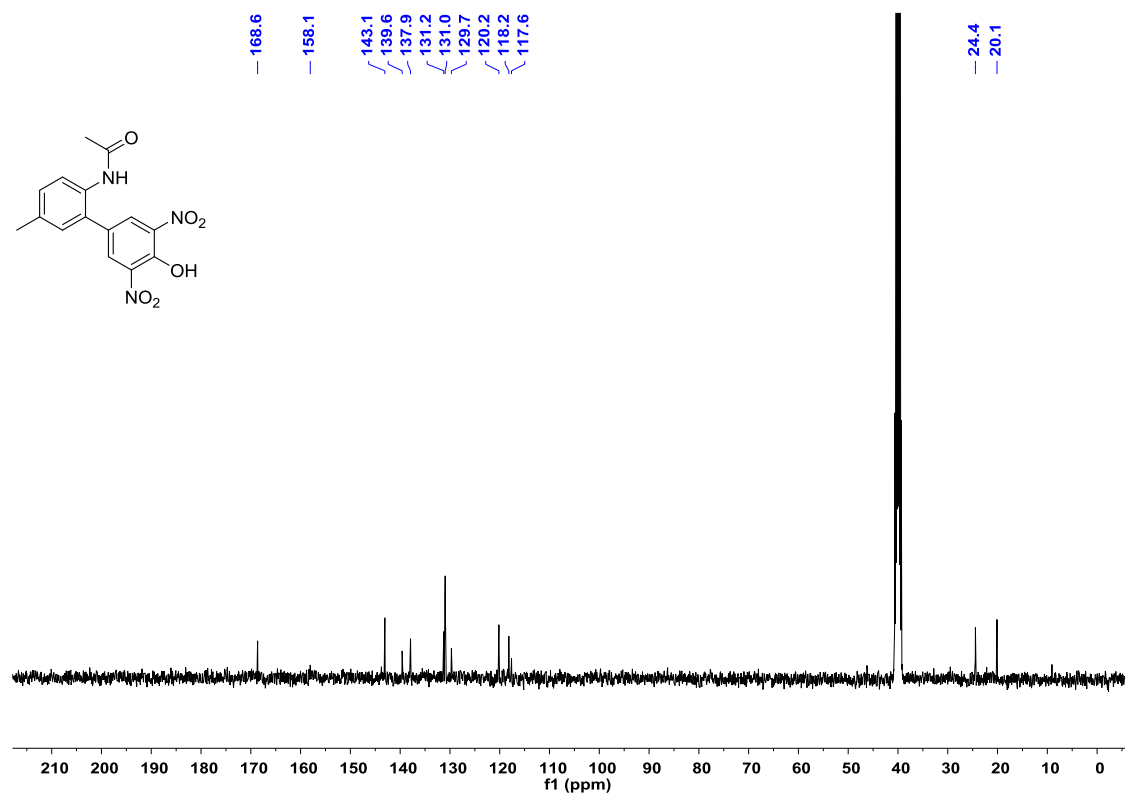

*N*-(4'-Hydroxy-5-methyl-3',5'-dinitro-[1,1'-biphenyl]-2-yl)-4-methylbenzamide (**25c**)

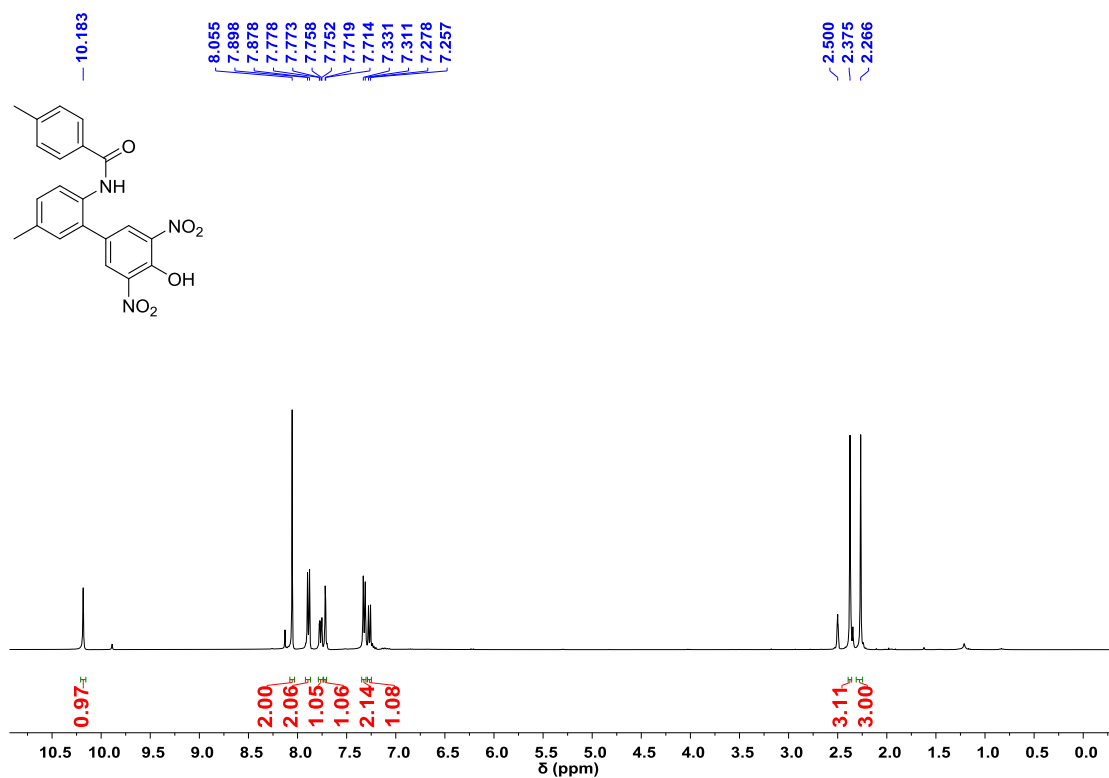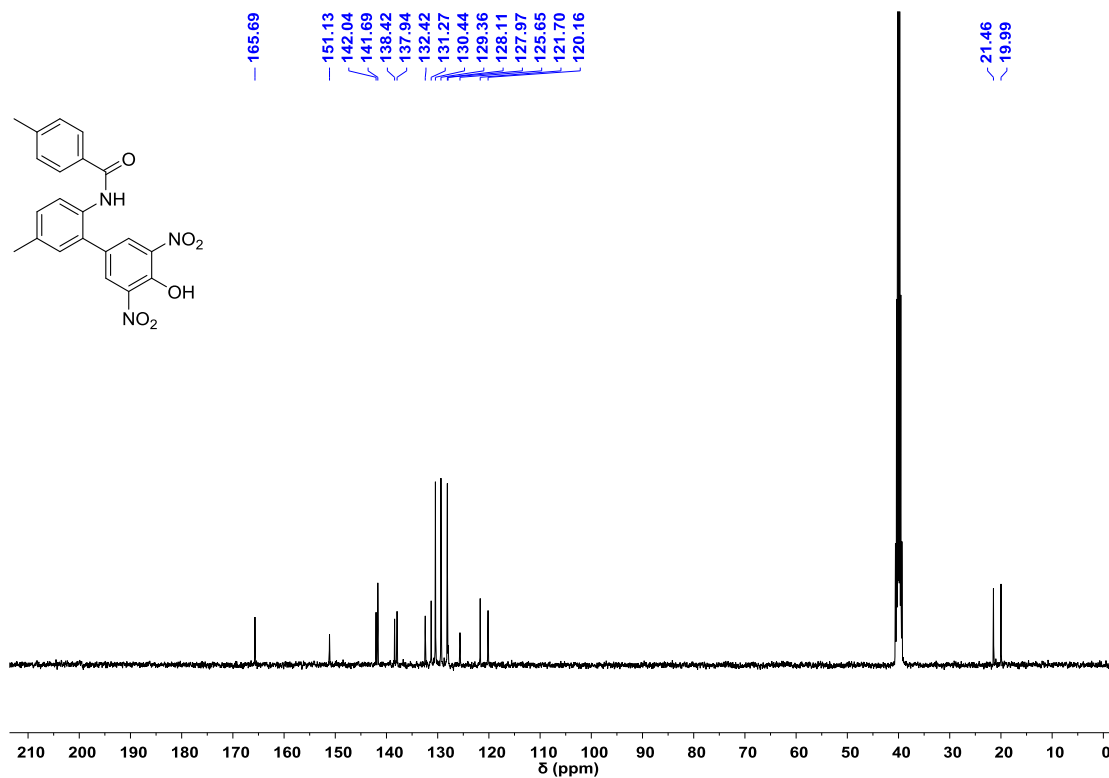

## Control experiments

GC-MS analysis for the reaction of **11f** and **2g** with phenol as additive

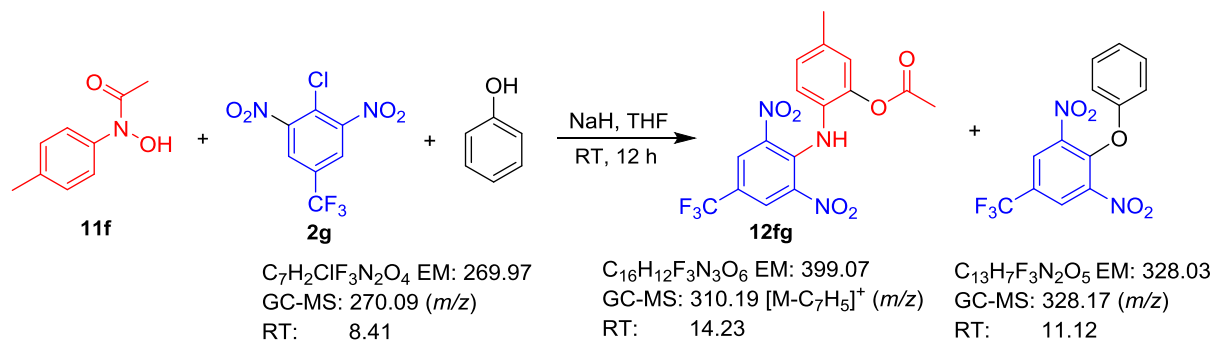

For product **12fg**, only its fragment ions at 310  $m/z$ , 293  $m/z$ , 263  $m/z$ , 234  $m/z$ , 194  $m/z$ , 102  $m/z$ , 89  $m/z$  were observed in GC-MS analysis at RT 14.23. It was verified by injection of the authentic sample **12fg**, showing the same fragment ions and RT value.

## GC profile

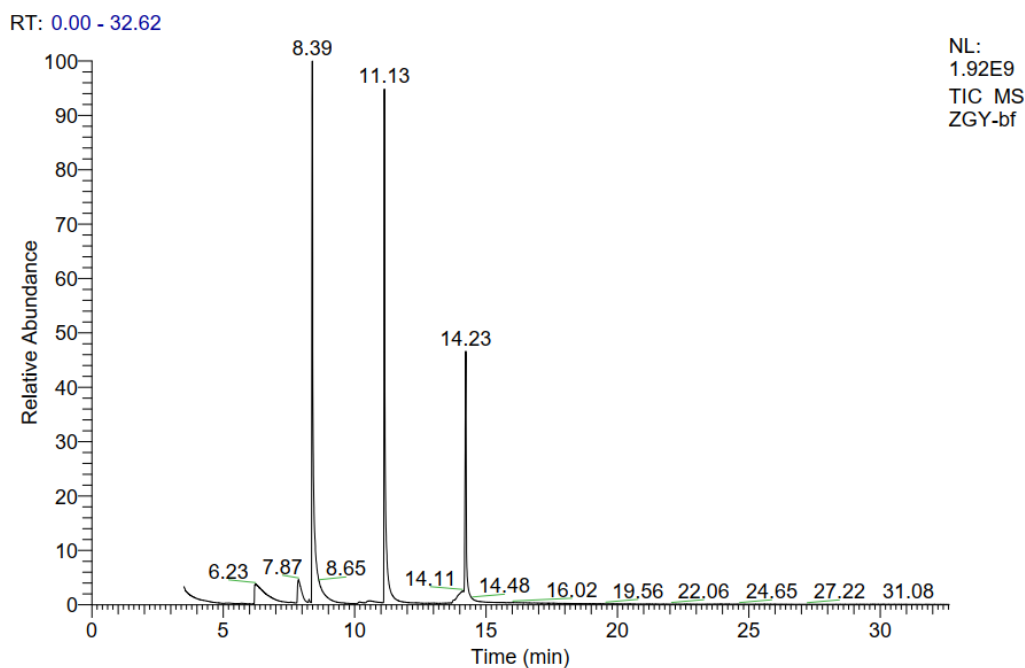

### MS spectrum of compound 2g at RT 8.41 min.

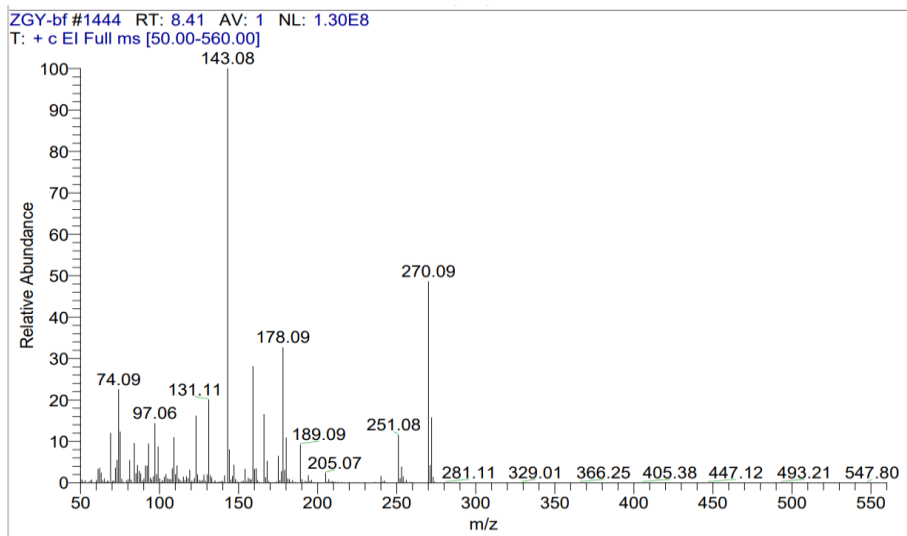

### MS spectrum of compound phenyl 2,6-dinitro-4-trifluoromethylphenyl ether at RT 11.12 min.

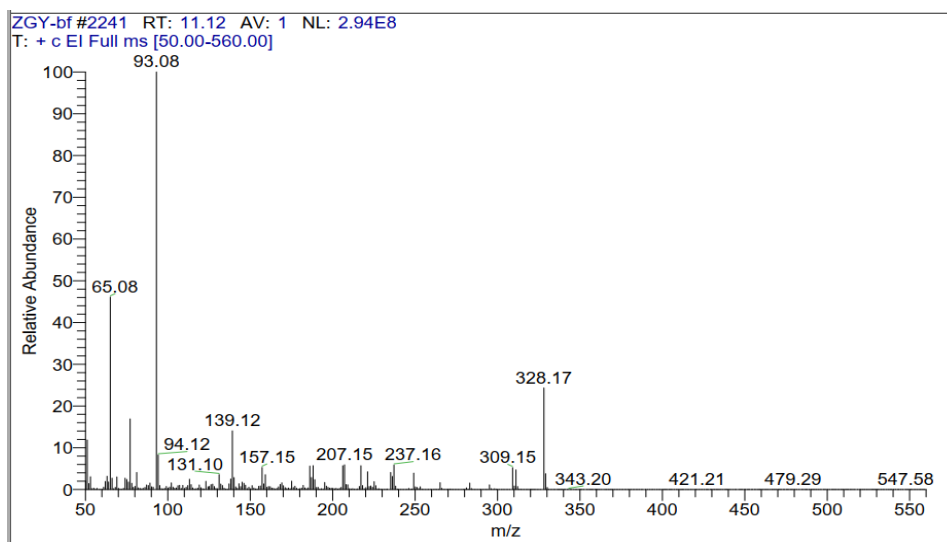

### MS spectrum of product 12fg at RT 14.23 min.

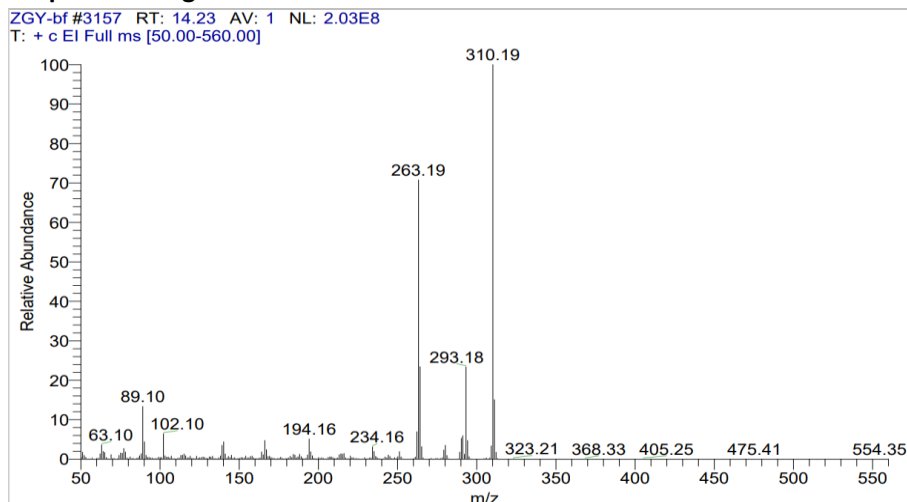

### GC-MS analysis of the authentic sample 12fg

#### GC profile

RT: 0.00 - 32.61

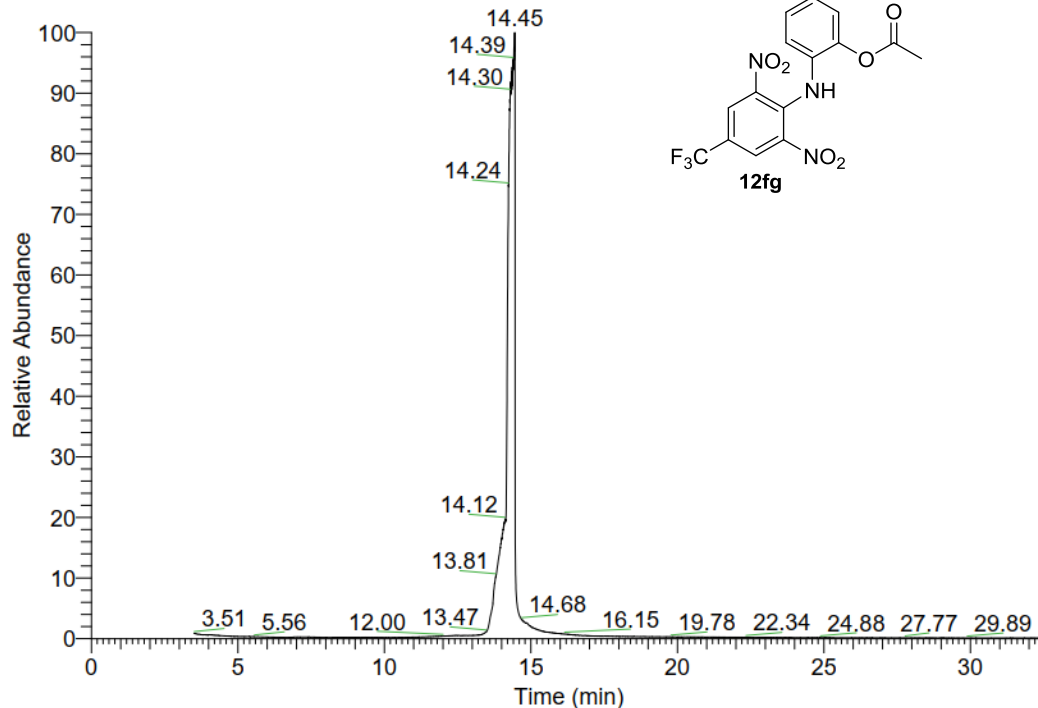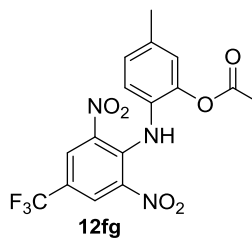

NL:  
1.94E9  
TIC MS  
ZGY-  
YIXIANJI

#### MS spectrum of authentic sample 12fg at RT 14.36 min.

ZGY-YIXIANJI #3194 RT: 14.36 AV: 1 NL: 4.71E8  
T: + c EI Full ms [50.00-560.00]

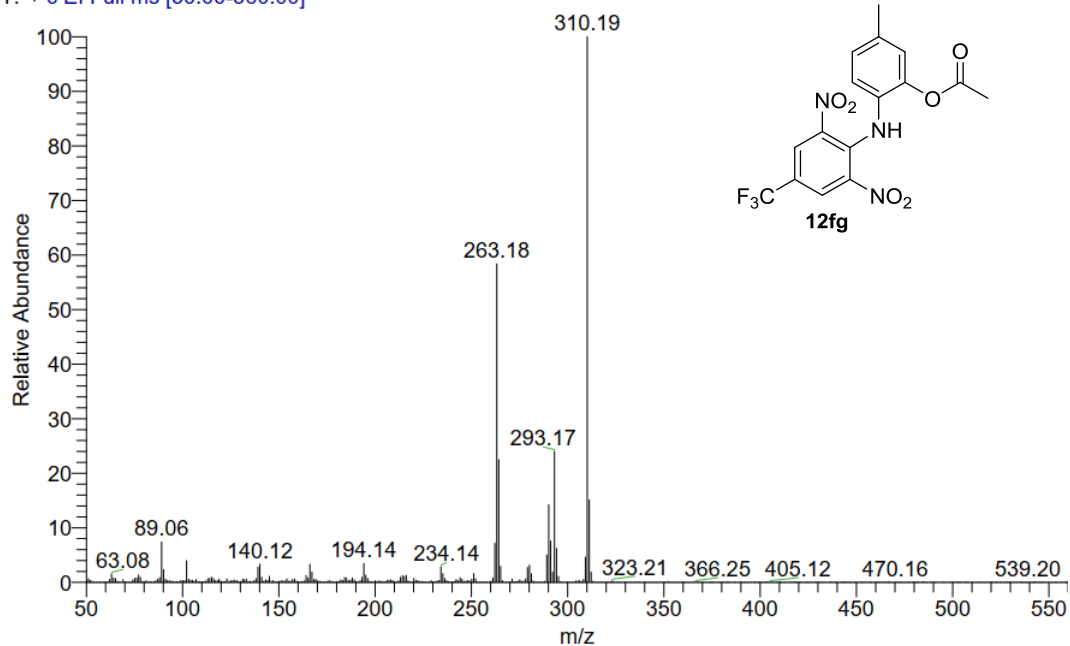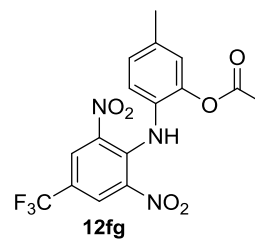



GC-MS analysis for the reaction of **11f** and **2g** with *N*-methylmaleimide as additive

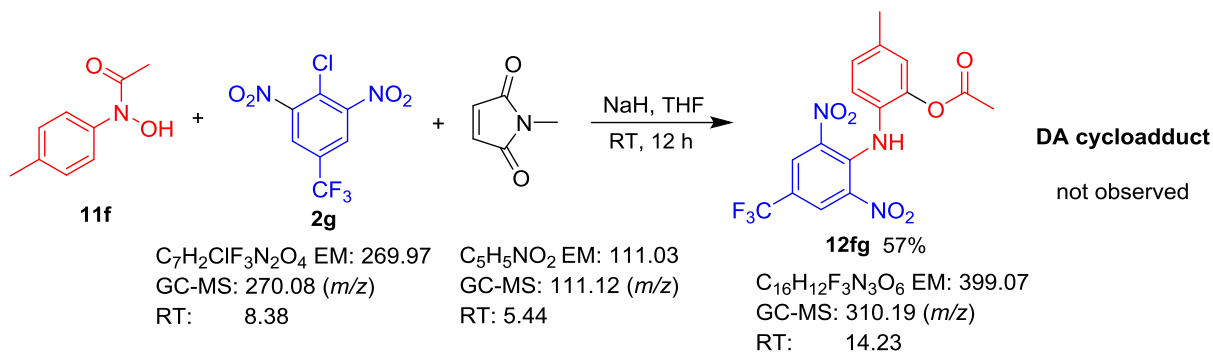

For product **12fg**, the same as that in the above reaction.

### GC profile

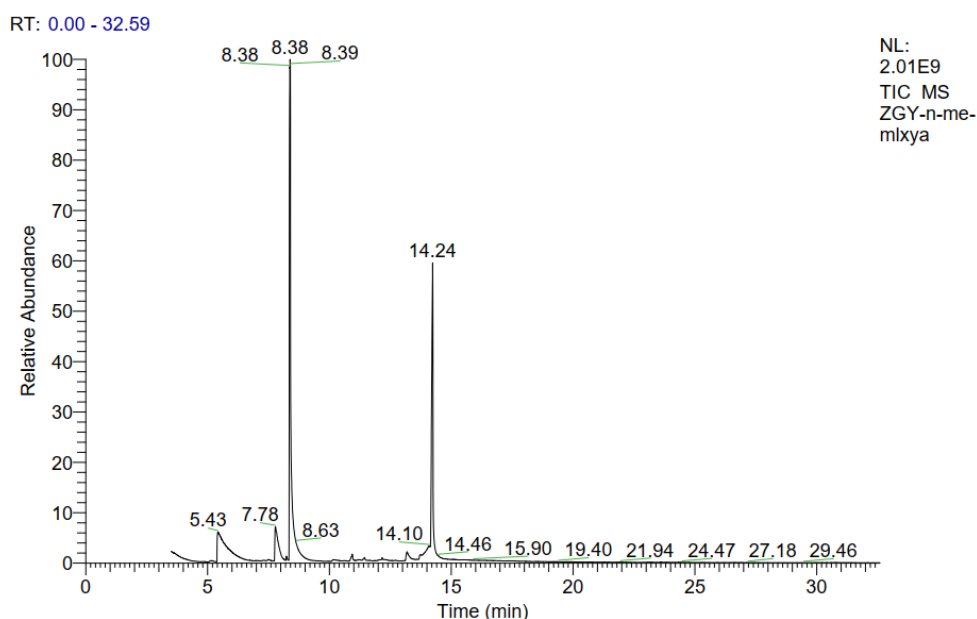

### MS spectrum of *N*-methylmaleimide at RT 5.44 min.

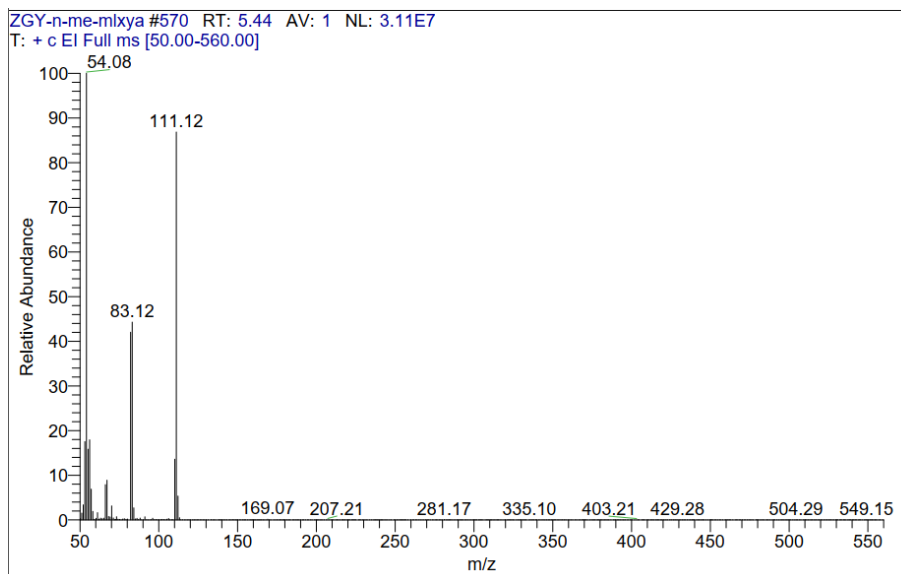

**MS spectrum of compound 2g at RT 8.38 min.**

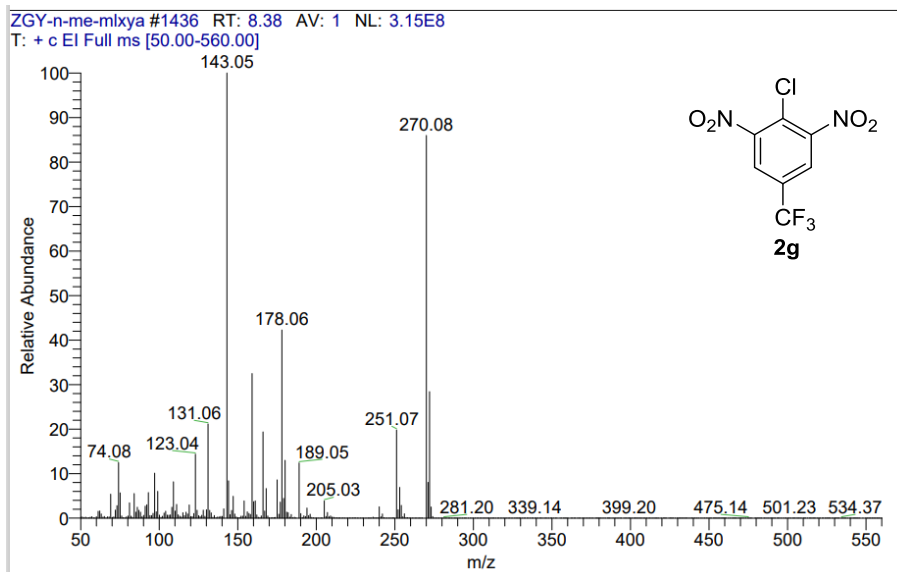

**MS spectrum of product 12fg at RT 14.20 min.**

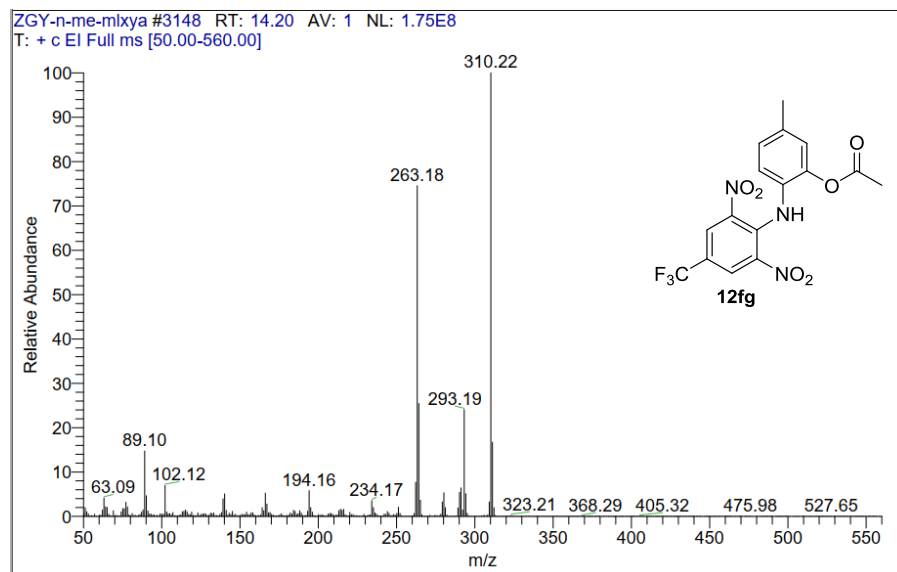

**DFT calculation****Table 1S.** Sum of electronic and zero-point energies ( $E$ , in Hartree), sum of electronic and thermal enthalpies ( $H$ , in Hartree), and sum of electronic and thermal free energies ( $G$ , in Hartree) for the rearrangement of **26a**.Relative energies ( $\Delta E$ ,  $\Delta H$ ,  $\Delta G$  and  $\Delta G_{sol}$  in DMSO) at 298 K are reported in kcal/mol.

| Structure      | E            | H            | G            | Gsol+ZPC     | $\Delta E_o$ | $\Delta H$ | $\Delta G$ | $\Delta G_{sol}$ |
|----------------|--------------|--------------|--------------|--------------|--------------|------------|------------|------------------|
| <b>26a</b>     | -1386.273267 | -1386.247555 | -1386.331619 | -1386.365822 | 0.0          | 0.0        | 0.0        | 0.0              |
| <b>TS-A-1</b>  | -1386.25140  | -1386.226073 | -1386.306439 | -1386.354773 | 13.7         | 13.5       | 15.8       | 6.9              |
| <b>Int-A-1</b> | -1386.265228 | -1386.239817 | -1386.320821 | -1386.374788 | 5.0          | 4.9        | 6.8        | -5.6             |
| <b>TS-A-2</b>  | -1386.238077 | -1386.212153 | -1386.295935 | -1386.346650 | 22.1         | 22.2       | 22.4       | 12.0             |
| <b>Int-2</b>   | -1386.266742 | -1386.240722 | -1386.326935 | -1386.403929 | 4.1          | 4.3        | 2.9        | -23.9            |
| <b>TS-AB-1</b> | -1386.250729 | -1386.225386 | -1386.307086 | -1386.362143 | 14.1         | 13.9       | 15.4       | 2.3              |
| <b>TS-B-1</b>  | -1386.243241 | -1386.217909 | -1386.300072 | -1386.356097 | 18.8         | 18.6       | 19.8       | 6.1              |
| <b>Int-B-1</b> | -1386.257151 | -1386.231496 | -1386.316224 | -1386.383258 | 10.1         | 10.1       | 9.7        | -10.9            |
| <b>TS-B-2</b>  | -1386.223795 | -1386.197496 | -1386.285355 | -1386.342530 | 31.0         | 31.4       | 29.0       | 14.6             |
| <b>25a</b>     | -1386.362278 | -1386.336756 | -1386.420499 | -1386.468999 | -55.9        | -56.0      | -55.8      | -64.7            |
| <b>TS-C-1</b>  | -1386.235584 | -1386.209469 | -1386.294484 | -1386.353994 | 23.6         | 23.9       | 23.3       | 7.4              |
| <b>Int-C-1</b> | -1386.290798 | -1386.264776 | -1386.349038 | -1386.390087 | -11.0        | -10.8      | -10.9      | -15.2            |
| <b>TS-C-2</b>  | -1386.256769 | -1386.231387 | -1386.312333 | -1386.365997 | 10.4         | 10.1       | 12.1       | -0.1             |
| <b>TS-D-1</b>  | -1386.254551 | -1386.228845 | -1386.311974 | -1386.353635 | 11.7         | 11.7       | 12.3       | 7.6              |
| <b>Int-D-1</b> | -1386.284377 | -1386.258827 | -1386.341423 | -1386.390889 | -7.0         | -7.1       | -6.2       | -15.7            |
| <b>TS-D-2</b>  | -1386.253680 | -1386.228595 | -1386.308636 | -1386.355299 | 12.3         | 11.9       | 14.4       | 6.6              |
| <b>Int-D-2</b> | -1386.262484 | -1386.237190 | -1386.317593 | -1386.365512 | 6.8          | 6.5        | 8.8        | 0.2              |
| <b>TS-D-3</b>  | -1386.257710 | -1386.232244 | -1386.315639 | -1386.371130 | 9.8          | 9.6        | 10.0       | -3.3             |

## Coordinates of all stationary points

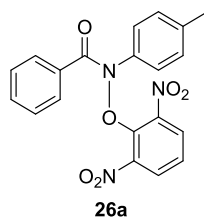

Standard orientation:

| Center Number | Atomic Number | Atomic Type | Coordinates (Angstroms) |           |           |
|---------------|---------------|-------------|-------------------------|-----------|-----------|
|               |               |             | X                       | Y         | Z         |
| 1             | 6             | 0           | 5.310397                | -0.050248 | -1.034148 |
| 2             | 6             | 0           | 4.213689                | 0.456827  | -1.731598 |
| 3             | 6             | 0           | 2.925907                | 0.005628  | -1.446279 |
| 4             | 6             | 0           | 2.734234                | -0.974172 | -0.462036 |
| 5             | 6             | 0           | 3.843129                | -1.502009 | 0.215489  |
| 6             | 6             | 0           | 5.122696                | -1.031448 | -0.058032 |
| 7             | 1             | 0           | 6.310068                | 0.314079  | -1.254138 |
| 8             | 1             | 0           | 4.357625                | 1.208844  | -2.501882 |
| 9             | 1             | 0           | 2.085181                | 0.411317  | -1.993952 |
| 10            | 1             | 0           | 3.679476                | -2.276686 | 0.956165  |
| 11            | 1             | 0           | 5.973685                | -1.432767 | 0.484415  |
| 12            | 6             | 0           | 1.422223                | -1.608226 | -0.141012 |
| 13            | 8             | 0           | 1.315069                | -2.791931 | 0.132023  |
| 14            | 7             | 0           | 0.257904                | -0.822101 | -0.078417 |
| 15            | 6             | 0           | -1.058059               | -1.342588 | -0.290072 |
| 16            | 6             | 0           | -1.600889               | -2.214232 | 0.654494  |
| 17            | 6             | 0           | -1.802510               | -0.945560 | -1.403076 |
| 18            | 6             | 0           | -2.889071               | -2.706014 | 0.462031  |
| 19            | 1             | 0           | -1.015236               | -2.495947 | 1.520277  |
| 20            | 6             | 0           | -3.098157               | -1.428890 | -1.563499 |
| 21            | 1             | 0           | -1.371407               | -0.262022 | -2.126614 |
| 22            | 6             | 0           | -3.659812               | -2.322398 | -0.642685 |
| 23            | 1             | 0           | -3.309161               | -3.389653 | 1.195164  |
| 24            | 1             | 0           | -3.679364               | -1.111607 | -2.425347 |
| 25            | 6             | 0           | -5.049001               | -2.874464 | -0.846320 |
| 26            | 1             | 0           | -5.017928               | -3.828340 | -1.388948 |
| 27            | 1             | 0           | -5.549373               | -3.061219 | 0.109585  |
| 28            | 1             | 0           | -5.671606               | -2.187833 | -1.428743 |
| 29            | 8             | 0           | 0.385308                | 0.535981  | -0.502712 |
| 30            | 6             | 0           | -0.259882               | 1.385366  | 0.343452  |
| 31            | 6             | 0           | -1.024371               | 2.438152  | -0.190812 |

|    |   |   |           |           |           |
|----|---|---|-----------|-----------|-----------|
| 32 | 6 | 0 | -0.287411 | 1.231613  | 1.737719  |
| 33 | 6 | 0 | -1.773169 | 3.286213  | 0.625427  |
| 34 | 6 | 0 | -1.054559 | 2.050284  | 2.556282  |
| 35 | 6 | 0 | -1.792565 | 3.093482  | 2.000281  |
| 36 | 1 | 0 | -2.350951 | 4.069741  | 0.151776  |
| 37 | 1 | 0 | -1.051369 | 1.864448  | 3.624308  |
| 38 | 1 | 0 | -2.378742 | 3.747217  | 2.636036  |
| 39 | 7 | 0 | -1.092748 | 2.669825  | -1.638389 |
| 40 | 8 | 0 | -2.088190 | 3.259387  | -2.059253 |
| 41 | 8 | 0 | -0.159690 | 2.280182  | -2.337366 |
| 42 | 7 | 0 | 0.551867  | 0.227848  | 2.409324  |
| 43 | 8 | 0 | 1.750752  | 0.248788  | 2.151171  |
| 44 | 8 | 0 | 0.000879  | -0.505217 | 3.226216  |

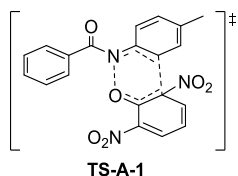

Standard orientation:

| Center Number | Atomic Number | Atomic Type | Coordinates (Angstroms) |           |           |
|---------------|---------------|-------------|-------------------------|-----------|-----------|
|               |               |             | X                       | Y         | Z         |
| 1             | 6             | 0           | 5.251785                | -0.706154 | 0.284862  |
| 2             | 6             | 0           | 4.322700                | 0.134972  | -0.329608 |
| 3             | 6             | 0           | 3.049118                | -0.341635 | -0.623946 |
| 4             | 6             | 0           | 2.695734                | -1.657787 | -0.299577 |
| 5             | 6             | 0           | 3.637847                | -2.503838 | 0.304137  |
| 6             | 6             | 0           | 4.910815                | -2.027202 | 0.595669  |
| 7             | 1             | 0           | 6.244468                | -0.334165 | 0.523055  |
| 8             | 1             | 0           | 4.573785                | 1.164049  | -0.565435 |
| 9             | 1             | 0           | 2.326678                | 0.291882  | -1.119590 |
| 10            | 1             | 0           | 3.347906                | -3.521825 | 0.541817  |
| 11            | 1             | 0           | 5.638146                | -2.678935 | 1.071082  |
| 12            | 6             | 0           | 1.338461                | -2.188150 | -0.566215 |
| 13            | 8             | 0           | 1.066532                | -3.382421 | -0.552283 |
| 14            | 7             | 0           | 0.393792                | -1.187759 | -0.908304 |
| 15            | 6             | 0           | -0.854691               | -1.291163 | -0.580979 |
| 16            | 6             | 0           | -1.480584               | -2.331958 | 0.223704  |
| 17            | 6             | 0           | -1.742457               | -0.212903 | -1.081766 |
| 18            | 6             | 0           | -2.827063               | -2.461682 | 0.203011  |

|    |   |   |           |           |           |
|----|---|---|-----------|-----------|-----------|
| 19 | 1 | 0 | -0.851291 | -3.014883 | 0.776903  |
| 20 | 6 | 0 | -3.140471 | -0.521536 | -1.233136 |
| 21 | 1 | 0 | -1.271322 | 0.417756  | -1.829713 |
| 22 | 6 | 0 | -3.685103 | -1.593825 | -0.591751 |
| 23 | 1 | 0 | -3.301953 | -3.252666 | 0.777040  |
| 24 | 1 | 0 | -3.770593 | 0.161795  | -1.793086 |
| 25 | 6 | 0 | -5.151140 | -1.901576 | -0.648116 |
| 26 | 1 | 0 | -5.681797 | -1.223980 | -1.321742 |
| 27 | 1 | 0 | -5.326796 | -2.932865 | -0.977517 |
| 28 | 1 | 0 | -5.589222 | -1.802018 | 0.353067  |
| 29 | 8 | 0 | 0.471946  | 0.481089  | 1.205905  |
| 30 | 6 | 0 | -0.176340 | 1.325567  | 0.607462  |
| 31 | 6 | 0 | 0.438745  | 2.451750  | -0.120931 |
| 32 | 6 | 0 | -1.664395 | 1.216986  | 0.384117  |
| 33 | 6 | 0 | -0.265384 | 3.346666  | -0.859661 |
| 34 | 6 | 0 | -2.370600 | 2.315000  | -0.254008 |
| 35 | 6 | 0 | -1.697299 | 3.298556  | -0.901957 |
| 36 | 1 | 0 | 0.271842  | 4.127962  | -1.387283 |
| 37 | 1 | 0 | -3.452168 | 2.287969  | -0.224576 |
| 38 | 1 | 0 | -2.235208 | 4.082010  | -1.424527 |
| 39 | 7 | 0 | 1.884899  | 2.639170  | -0.016502 |
| 40 | 8 | 0 | 2.485930  | 2.955834  | -1.049885 |
| 41 | 8 | 0 | 2.398290  | 2.483876  | 1.083168  |
| 42 | 7 | 0 | -2.459561 | 0.586779  | 1.480475  |
| 43 | 8 | 0 | -1.884624 | 0.087322  | 2.435923  |
| 44 | 8 | 0 | -3.687380 | 0.606807  | 1.332542  |

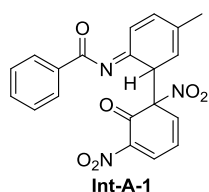

Standard orientation:

| Center Number | Atomic Number | Atomic Type | Coordinates (Angstroms) |           |           |
|---------------|---------------|-------------|-------------------------|-----------|-----------|
|               |               |             | X                       | Y         | Z         |
| 1             | 6             | 0           | -5.219873               | -1.830394 | 0.351985  |
| 2             | 6             | 0           | -4.947693               | -0.770373 | -0.517748 |
| 3             | 6             | 0           | -3.638079               | -0.503488 | -0.898092 |
| 4             | 6             | 0           | -2.588440               | -1.296598 | -0.409358 |
| 5             | 6             | 0           | -2.865738               | -2.360260 | 0.461441  |

|    |   |   |           |           |           |
|----|---|---|-----------|-----------|-----------|
| 6  | 6 | 0 | -4.179105 | -2.622987 | 0.840857  |
| 7  | 1 | 0 | -6.244060 | -2.036089 | 0.651105  |
| 8  | 1 | 0 | -5.756319 | -0.148609 | -0.889998 |
| 9  | 1 | 0 | -3.407183 | 0.322897  | -1.560904 |
| 10 | 1 | 0 | -2.044708 | -2.963507 | 0.829020  |
| 11 | 1 | 0 | -4.392527 | -3.444774 | 1.518209  |
| 12 | 6 | 0 | -1.202198 | -0.963345 | -0.809379 |
| 13 | 8 | 0 | -0.962222 | -0.039096 | -1.596043 |
| 14 | 7 | 0 | -0.224968 | -1.804296 | -0.266681 |
| 15 | 6 | 0 | 1.046125  | -1.552301 | -0.271248 |
| 16 | 6 | 0 | 1.728438  | -0.250322 | -0.721022 |
| 17 | 6 | 0 | 1.903796  | -2.661475 | 0.110526  |
| 18 | 6 | 0 | 3.188748  | -0.417794 | -1.041612 |
| 19 | 1 | 0 | 1.180519  | 0.081780  | -1.607872 |
| 20 | 6 | 0 | 3.232433  | -2.654363 | -0.124163 |
| 21 | 1 | 0 | 1.401127  | -3.519552 | 0.542292  |
| 22 | 6 | 0 | 3.899617  | -1.524709 | -0.759938 |
| 23 | 1 | 0 | 3.675535  | 0.420545  | -1.530744 |
| 24 | 1 | 0 | 3.833748  | -3.520683 | 0.140057  |
| 25 | 6 | 0 | 5.362987  | -1.654004 | -1.085780 |
| 26 | 1 | 0 | 5.544524  | -2.508891 | -1.749106 |
| 27 | 1 | 0 | 5.748404  | -0.754727 | -1.574309 |
| 28 | 1 | 0 | 5.949352  | -1.826020 | -0.174385 |
| 29 | 8 | 0 | -0.384283 | 0.448779  | 1.569160  |
| 30 | 6 | 0 | 0.080498  | 1.169093  | 0.715845  |
| 31 | 6 | 0 | 1.573438  | 0.987645  | 0.280759  |
| 32 | 6 | 0 | -0.650471 | 2.215546  | -0.033869 |
| 33 | 6 | 0 | 2.186739  | 2.210502  | -0.331427 |
| 34 | 6 | 0 | -0.010521 | 3.150146  | -0.767809 |
| 35 | 6 | 0 | 1.431662  | 3.186116  | -0.860220 |
| 36 | 1 | 0 | 3.267643  | 2.261365  | -0.360366 |
| 37 | 1 | 0 | -0.605082 | 3.901996  | -1.274698 |
| 38 | 1 | 0 | 1.894506  | 4.034657  | -1.353054 |
| 39 | 7 | 0 | 2.333867  | 0.686992  | 1.576745  |
| 40 | 8 | 0 | 2.901745  | 1.642919  | 2.101310  |
| 41 | 8 | 0 | 2.290960  | -0.447574 | 2.018593  |
| 42 | 7 | 0 | -2.110750 | 2.300183  | 0.055878  |
| 43 | 8 | 0 | -2.655895 | 1.826901  | 1.044771  |
| 44 | 8 | 0 | -2.693643 | 2.853027  | -0.880957 |

---

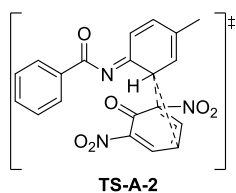

Standard orientation:

| Center Number | Atomic Number | Atomic Type | Coordinates (Angstroms) |           |           |
|---------------|---------------|-------------|-------------------------|-----------|-----------|
|               |               |             | X                       | Y         | Z         |
| 1             | 6             | 0           | 4.825948                | 2.036584  | 1.351532  |
| 2             | 6             | 0           | 4.359161                | 0.725561  | 1.213303  |
| 3             | 6             | 0           | 3.193133                | 0.468005  | 0.500881  |
| 4             | 6             | 0           | 2.483539                | 1.531990  | -0.075854 |
| 5             | 6             | 0           | 2.944179                | 2.851883  | 0.078218  |
| 6             | 6             | 0           | 4.117972                | 3.098506  | 0.783645  |
| 7             | 1             | 0           | 5.738323                | 2.230767  | 1.908648  |
| 8             | 1             | 0           | 4.900435                | -0.098736 | 1.667095  |
| 9             | 1             | 0           | 2.811808                | -0.541991 | 0.426396  |
| 10            | 1             | 0           | 2.386583                | 3.664471  | -0.372428 |
| 11            | 1             | 0           | 4.481946                | 4.116176  | 0.890332  |
| 12            | 6             | 0           | 1.246977                | 1.240607  | -0.835854 |
| 13            | 8             | 0           | 1.015048                | 0.175393  | -1.410851 |
| 14            | 7             | 0           | 0.371883                | 2.328862  | -0.897303 |
| 15            | 6             | 0           | -0.936831               | 2.205082  | -0.785738 |
| 16            | 6             | 0           | -1.659546               | 0.970167  | -0.565816 |
| 17            | 6             | 0           | -1.695203               | 3.434701  | -0.795904 |
| 18            | 6             | 0           | -3.000570               | 1.002900  | -0.268283 |
| 19            | 1             | 0           | -1.126028               | 0.039002  | -0.657186 |
| 20            | 6             | 0           | -3.035920               | 3.433100  | -0.511838 |
| 21            | 1             | 0           | -1.146269               | 4.352029  | -0.978584 |
| 22            | 6             | 0           | -3.713132               | 2.220741  | -0.220131 |
| 23            | 1             | 0           | -3.517825               | 0.078935  | -0.036890 |
| 24            | 1             | 0           | -3.590466               | 4.366534  | -0.484387 |
| 25            | 6             | 0           | -5.174454               | 2.219516  | 0.105742  |
| 26            | 1             | 0           | -5.762618               | 1.982771  | -0.793046 |
| 27            | 1             | 0           | -5.409444               | 1.454787  | 0.852944  |
| 28            | 1             | 0           | -5.511186               | 3.193926  | 0.470396  |
| 29            | 8             | 0           | 0.799314                | -1.609452 | 1.468018  |
| 30            | 6             | 0           | 0.056333                | -2.028430 | 0.582497  |
| 31            | 6             | 0           | -1.419160               | -2.085989 | 0.717029  |
| 32            | 6             | 0           | 0.504110                | -2.435500 | -0.769544 |
| 33            | 6             | 0           | -2.264105               | -2.425615 | -0.318097 |
| 34            | 6             | 0           | -0.368178               | -2.743775 | -1.792537 |



|    |   |   |           |           |           |
|----|---|---|-----------|-----------|-----------|
| 35 | 6 | 0 | -1.750331 | -2.739539 | -1.582675 |
| 36 | 1 | 0 | -3.331803 | -2.443004 | -0.132129 |
| 37 | 1 | 0 | 0.049697  | -2.996083 | -2.759390 |
| 38 | 1 | 0 | -2.422592 | -3.008557 | -2.389701 |
| 39 | 7 | 0 | -2.040303 | -1.763314 | 1.992964  |
| 40 | 8 | 0 | -3.186791 | -1.279642 | 1.956643  |
| 41 | 8 | 0 | -1.423173 | -1.997412 | 3.023943  |
| 42 | 7 | 0 | 1.926223  | -2.579033 | -1.065715 |
| 43 | 8 | 0 | 2.698732  | -2.753652 | -0.123137 |
| 44 | 8 | 0 | 2.267030  | -2.557685 | -2.250260 |

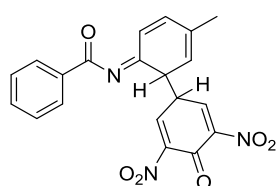

Int-2

Standard orientation:

| Center Number | Atomic Number | Atomic Type | Coordinates (Angstroms) |           |           |
|---------------|---------------|-------------|-------------------------|-----------|-----------|
|               |               |             | X                       | Y         | Z         |
| 1             | 6             | 0           | 5.078433                | -1.856971 | 1.385558  |
| 2             | 6             | 0           | 4.946847                | -2.123631 | 0.019470  |
| 3             | 6             | 0           | 4.244433                | -1.242417 | -0.795941 |
| 4             | 6             | 0           | 3.670283                | -0.085887 | -0.248827 |
| 5             | 6             | 0           | 3.808621                | 0.181036  | 1.120985  |
| 6             | 6             | 0           | 4.510211                | -0.705430 | 1.934821  |
| 7             | 1             | 0           | 5.625951                | -2.546681 | 2.021602  |
| 8             | 1             | 0           | 5.390917                | -3.019048 | -0.405206 |
| 9             | 1             | 0           | 4.124315                | -1.427359 | -1.858115 |
| 10            | 1             | 0           | 3.376353                | 1.087152  | 1.531303  |
| 11            | 1             | 0           | 4.618506                | -0.497072 | 2.995036  |
| 12            | 6             | 0           | 2.874468                | 0.799284  | -1.143946 |
| 13            | 8             | 0           | 2.795027                | 0.615467  | -2.354625 |
| 14            | 7             | 0           | 2.260130                | 1.883390  | -0.505830 |
| 15            | 6             | 0           | 1.001445                | 2.138296  | -0.607463 |
| 16            | 6             | 0           | 0.003762                | 1.183758  | -1.265506 |
| 17            | 6             | 0           | 0.483075                | 3.356719  | -0.012452 |
| 18            | 6             | 0           | -1.388513               | 1.725949  | -1.412049 |
| 19            | 1             | 0           | 0.414352                | 0.922102  | -2.246879 |
| 20            | 6             | 0           | -0.820613               | 3.694770  | -0.127161 |

|    |   |   |           |           |           |
|----|---|---|-----------|-----------|-----------|
| 21 | 1 | 0 | 1.195293  | 3.982324  | 0.515198  |
| 22 | 6 | 0 | -1.791316 | 2.886232  | -0.864976 |
| 23 | 1 | 0 | -2.096289 | 1.106100  | -1.956239 |
| 24 | 1 | 0 | -1.175836 | 4.615588  | 0.329431  |
| 25 | 6 | 0 | -3.202383 | 3.396876  | -0.974309 |
| 26 | 1 | 0 | -3.228542 | 4.384278  | -1.451773 |
| 27 | 1 | 0 | -3.829883 | 2.717846  | -1.557541 |
| 28 | 1 | 0 | -3.654020 | 3.508173  | 0.019449  |
| 29 | 8 | 0 | -3.370482 | -2.121573 | 1.177313  |
| 30 | 6 | 0 | -2.460169 | -1.493278 | 0.679681  |
| 31 | 6 | 0 | -1.930319 | -1.752500 | -0.691146 |
| 32 | 6 | 0 | -1.667174 | -0.462518 | 1.408332  |
| 33 | 6 | 0 | -0.812565 | -1.203191 | -1.180662 |
| 34 | 6 | 0 | -0.542069 | 0.087630  | 0.939387  |
| 35 | 6 | 0 | -0.035259 | -0.172473 | -0.437663 |
| 36 | 1 | 0 | -0.461937 | -1.489928 | -2.168213 |
| 37 | 1 | 0 | 0.007720  | 0.785432  | 1.562659  |
| 38 | 1 | 0 | 1.005733  | -0.517843 | -0.366868 |
| 39 | 7 | 0 | -2.679905 | -2.683863 | -1.551147 |
| 40 | 8 | 0 | -2.026713 | -3.463577 | -2.242639 |
| 41 | 8 | 0 | -3.899124 | -2.575410 | -1.539791 |
| 42 | 7 | 0 | -2.144470 | -0.031599 | 2.733092  |
| 43 | 8 | 0 | -3.352645 | 0.120167  | 2.857222  |
| 44 | 8 | 0 | -1.294826 | 0.187415  | 3.595838  |

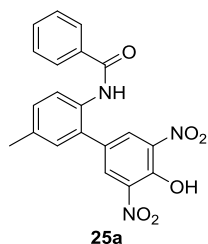

Standard orientation:

| Center Number | Atomic Number | Atomic Type | Coordinates (Angstroms) |           |           |
|---------------|---------------|-------------|-------------------------|-----------|-----------|
|               |               |             | X                       | Y         | Z         |
| 1             | 6             | 0           | -4.020447               | -2.628764 | -0.633911 |
| 2             | 6             | 0           | -3.037874               | -3.545490 | -0.258794 |
| 3             | 6             | 0           | -1.691961               | -3.251073 | -0.467838 |
| 4             | 6             | 0           | -1.319929               | -2.040164 | -1.064159 |
| 5             | 6             | 0           | -2.313215               | -1.138732 | -1.467101 |
| 6             | 6             | 0           | -3.656202               | -1.425952 | -1.243046 |

|    |   |   |           |           |           |
|----|---|---|-----------|-----------|-----------|
| 7  | 1 | 0 | -5.067787 | -2.851870 | -0.453360 |
| 8  | 1 | 0 | -3.318626 | -4.487885 | 0.201699  |
| 9  | 1 | 0 | -0.940740 | -3.984912 | -0.186922 |
| 10 | 1 | 0 | -2.004453 | -0.212241 | -1.938715 |
| 11 | 1 | 0 | -4.418859 | -0.711184 | -1.537433 |
| 12 | 6 | 0 | 0.097496  | -1.588383 | -1.232289 |
| 13 | 8 | 0 | 0.421110  | -0.729102 | -2.041399 |
| 14 | 7 | 0 | 1.002176  | -2.129724 | -0.337188 |
| 15 | 6 | 0 | 2.269376  | -1.526277 | -0.077294 |
| 16 | 6 | 0 | 2.349087  | -0.175849 | 0.323039  |
| 17 | 6 | 0 | 3.434792  | -2.277880 | -0.203228 |
| 18 | 6 | 0 | 3.607399  | 0.387912  | 0.546948  |
| 19 | 6 | 0 | 4.677888  | -1.703444 | 0.055684  |
| 20 | 1 | 0 | 3.359366  | -3.312892 | -0.522238 |
| 21 | 6 | 0 | 4.784907  | -0.357224 | 0.419964  |
| 22 | 1 | 0 | 3.665364  | 1.429165  | 0.854509  |
| 23 | 1 | 0 | 5.576949  | -2.306046 | -0.042071 |
| 24 | 6 | 0 | 6.131272  | 0.283161  | 0.650714  |
| 25 | 1 | 0 | 6.522887  | 0.719335  | -0.277348 |
| 26 | 1 | 0 | 6.070158  | 1.089228  | 1.388912  |
| 27 | 1 | 0 | 6.866086  | -0.447342 | 1.003558  |
| 28 | 8 | 0 | -2.611861 | 2.556193  | 0.515254  |
| 29 | 6 | 0 | -1.418230 | 1.982922  | 0.530848  |
| 30 | 6 | 0 | -0.298967 | 2.475366  | -0.198063 |
| 31 | 6 | 0 | -1.185687 | 0.795749  | 1.264954  |
| 32 | 6 | 0 | 0.925036  | 1.804692  | -0.236376 |
| 33 | 6 | 0 | 0.043216  | 0.154117  | 1.244355  |
| 34 | 6 | 0 | 1.111910  | 0.626050  | 0.474455  |
| 35 | 1 | 0 | 1.707323  | 2.199707  | -0.871223 |
| 36 | 1 | 0 | 0.137020  | -0.754884 | 1.821722  |
| 37 | 7 | 0 | -0.412948 | 3.688178  | -0.985226 |
| 38 | 8 | 0 | 0.579083  | 4.124369  | -1.552141 |
| 39 | 8 | 0 | -1.530147 | 4.251764  | -1.053056 |
| 40 | 7 | 0 | -2.249807 | 0.155239  | 2.047479  |
| 41 | 8 | 0 | -3.201772 | 0.836217  | 2.410730  |
| 42 | 8 | 0 | -2.103773 | -1.044094 | 2.301049  |
| 43 | 1 | 0 | -2.535226 | 3.339291  | -0.090737 |
| 44 | 1 | 0 | 0.644265  | -2.770511 | 0.357533  |

---

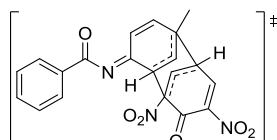

TS-AB-1

Standard orientation:

| Center Number | Atomic Number | Atomic Type | Coordinates (Angstroms) |           |           |
|---------------|---------------|-------------|-------------------------|-----------|-----------|
|               |               |             | X                       | Y         | Z         |
| 1             | 6             | 0           | 5.697459                | -1.344959 | 0.383313  |
| 2             | 6             | 0           | 5.471735                | -1.286530 | -0.995178 |
| 3             | 6             | 0           | 4.449259                | -0.489241 | -1.497095 |
| 4             | 6             | 0           | 3.650200                | 0.259838  | -0.622356 |
| 5             | 6             | 0           | 3.879118                | 0.198968  | 0.758975  |
| 6             | 6             | 0           | 4.899798                | -0.604873 | 1.258146  |
| 7             | 1             | 0           | 6.494250                | -1.971172 | 0.775236  |
| 8             | 1             | 0           | 6.090971                | -1.866205 | -1.673485 |
| 9             | 1             | 0           | 4.247710                | -0.432110 | -2.561297 |
| 10            | 1             | 0           | 3.250593                | 0.770474  | 1.431592  |
| 11            | 1             | 0           | 5.070036                | -0.657983 | 2.329223  |
| 12            | 6             | 0           | 2.554690                | 1.074172  | -1.200173 |
| 13            | 8             | 0           | 2.350507                | 1.174347  | -2.404830 |
| 14            | 7             | 0           | 1.819341                | 1.831519  | -0.264004 |
| 15            | 6             | 0           | 0.530566                | 1.946201  | -0.312708 |
| 16            | 6             | 0           | -0.369903               | 1.193416  | -1.197549 |
| 17            | 6             | 0           | -0.087747               | 2.910671  | 0.595748  |
| 18            | 6             | 0           | -1.710136               | 1.370847  | -1.128169 |
| 19            | 1             | 0           | 0.073941                | 0.542025  | -1.939165 |
| 20            | 6             | 0           | -1.427298               | 3.038100  | 0.680495  |
| 21            | 1             | 0           | 0.589122                | 3.516521  | 1.188811  |
| 22            | 6             | 0           | -2.329310               | 2.190939  | -0.102776 |
| 23            | 1             | 0           | -2.364602               | 0.835123  | -1.809251 |
| 24            | 1             | 0           | -1.874709               | 3.761664  | 1.357662  |
| 25            | 6             | 0           | -3.705111               | 2.748357  | -0.395412 |
| 26            | 1             | 0           | -3.600711               | 3.607220  | -1.070714 |
| 27            | 1             | 0           | -4.343365               | 2.013535  | -0.892159 |
| 28            | 1             | 0           | -4.204986               | 3.102949  | 0.511357  |
| 29            | 8             | 0           | -1.054597               | -2.651440 | -0.277402 |
| 30            | 6             | 0           | -1.581926               | -1.690372 | 0.252341  |
| 31            | 6             | 0           | -0.887216               | -0.756277 | 1.185236  |
| 32            | 6             | 0           | -3.004433               | -1.312648 | 0.052795  |
| 33            | 6             | 0           | -1.494848               | 0.289910  | 1.794510  |
| 34            | 6             | 0           | -3.572037               | -0.207622 | 0.585776  |

|    |   |   |           |           |           |
|----|---|---|-----------|-----------|-----------|
| 35 | 6 | 0 | -2.795148 | 0.721398  | 1.368941  |
| 36 | 1 | 0 | -0.932494 | 0.877821  | 2.508966  |
| 37 | 1 | 0 | -4.612383 | 0.005653  | 0.367181  |
| 38 | 1 | 0 | -3.336845 | 1.401182  | 2.019201  |
| 39 | 7 | 0 | 0.534963  | -0.971399 | 1.468293  |
| 40 | 8 | 0 | 0.944954  | -0.673415 | 2.592649  |
| 41 | 8 | 0 | 1.227120  | -1.383798 | 0.545638  |
| 42 | 7 | 0 | -3.844978 | -2.161190 | -0.793356 |
| 43 | 8 | 0 | -3.718897 | -3.373415 | -0.689855 |
| 44 | 8 | 0 | -4.638846 | -1.579901 | -1.542306 |

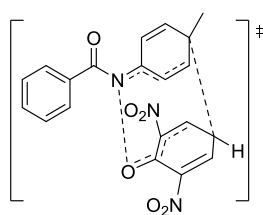

**TS-B-1**

Standard orientation:

| Center Number | Atomic Number | Atomic Type | Coordinates (Angstroms) |           |           |
|---------------|---------------|-------------|-------------------------|-----------|-----------|
|               |               |             | X                       | Y         | Z         |
| 1             | 6             | 0           | -6.373578               | 0.109541  | -0.918859 |
| 2             | 6             | 0           | -5.431121               | 0.511168  | -1.867783 |
| 3             | 6             | 0           | -4.075546               | 0.511345  | -1.546621 |
| 4             | 6             | 0           | -3.659825               | 0.111263  | -0.269415 |
| 5             | 6             | 0           | -4.608817               | -0.294236 | 0.679421  |
| 6             | 6             | 0           | -5.961106               | -0.294549 | 0.354506  |
| 7             | 1             | 0           | -7.430165               | 0.106883  | -1.172205 |
| 8             | 1             | 0           | -5.752841               | 0.816995  | -2.859085 |
| 9             | 1             | 0           | -3.330364               | 0.804573  | -2.277615 |
| 10            | 1             | 0           | -4.260990               | -0.605493 | 1.658616  |
| 11            | 1             | 0           | -6.695598               | -0.610868 | 1.089422  |
| 12            | 6             | 0           | -2.228714               | 0.122463  | 0.126492  |
| 13            | 8             | 0           | -1.835079               | -0.303639 | 1.207707  |
| 14            | 7             | 0           | -1.339931               | 0.585299  | -0.856493 |
| 15            | 6             | 0           | -0.313543               | 1.303173  | -0.529327 |
| 16            | 6             | 0           | -0.092373               | 1.956334  | 0.767525  |
| 17            | 6             | 0           | 0.727791                | 1.490012  | -1.537169 |
| 18            | 6             | 0           | 1.112220                | 2.479533  | 1.070284  |
| 19            | 1             | 0           | -0.909490               | 1.989860  | 1.476820  |
| 20            | 6             | 0           | 1.935280                | 1.984646  | -1.203532 |

|    |   |   |          |           |           |
|----|---|---|----------|-----------|-----------|
| 21 | 1 | 0 | 0.504096 | 1.151369  | -2.543027 |
| 22 | 6 | 0 | 2.273306 | 2.338387  | 0.179505  |
| 23 | 1 | 0 | 1.273591 | 2.957241  | 2.033690  |
| 24 | 1 | 0 | 2.721059 | 2.049898  | -1.951162 |
| 25 | 6 | 0 | 3.377996 | 3.364049  | 0.348266  |
| 26 | 1 | 0 | 3.031005 | 4.336783  | -0.021760 |
| 27 | 1 | 0 | 3.656175 | 3.487260  | 1.399408  |
| 28 | 1 | 0 | 4.271067 | 3.090566  | -0.222395 |
| 29 | 8 | 0 | 0.532423 | -2.151205 | -0.474787 |
| 30 | 6 | 0 | 1.434914 | -1.510179 | 0.025798  |
| 31 | 6 | 0 | 2.665233 | -1.103897 | -0.717864 |
| 32 | 6 | 0 | 1.411072 | -0.945448 | 1.404318  |
| 33 | 6 | 0 | 3.490241 | -0.119492 | -0.309764 |
| 34 | 6 | 0 | 2.237835 | 0.044053  | 1.796014  |
| 35 | 6 | 0 | 3.187702 | 0.651549  | 0.881947  |
| 36 | 1 | 0 | 4.328836 | 0.161764  | -0.937995 |
| 37 | 1 | 0 | 2.126770 | 0.438577  | 2.799408  |
| 38 | 1 | 0 | 4.029777 | 1.152283  | 1.350993  |
| 39 | 7 | 0 | 2.955107 | -1.759465 | -1.994133 |
| 40 | 8 | 0 | 3.454451 | -1.059977 | -2.882186 |
| 41 | 8 | 0 | 2.702552 | -2.953441 | -2.085595 |
| 42 | 7 | 0 | 0.476217 | -1.487672 | 2.402301  |
| 43 | 8 | 0 | 0.086142 | -2.634512 | 2.236955  |
| 44 | 8 | 0 | 0.202450 | -0.766365 | 3.361993  |

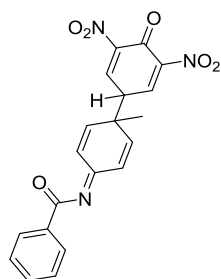

**Int-B-1**

Standard orientation:

| Center Number | Atomic Number | Atomic Type | Coordinates (Angstroms) |           |           |
|---------------|---------------|-------------|-------------------------|-----------|-----------|
|               |               |             | X                       | Y         | Z         |
| 1             | 6             | 0           | 8.226194                | -0.057269 | 0.541989  |
| 2             | 6             | 0           | 7.802624                | 1.083576  | -0.146131 |
| 3             | 6             | 0           | 6.492531                | 1.171641  | -0.604999 |
| 4             | 6             | 0           | 5.595790                | 0.118151  | -0.378348 |

|    |   |   |           |           |           |
|----|---|---|-----------|-----------|-----------|
| 5  | 6 | 0 | 6.024786  | -1.025559 | 0.308898  |
| 6  | 6 | 0 | 7.337411  | -1.110236 | 0.768209  |
| 7  | 1 | 0 | 9.249956  | -0.125845 | 0.899254  |
| 8  | 1 | 0 | 8.495759  | 1.900868  | -0.322994 |
| 9  | 1 | 0 | 6.138584  | 2.045544  | -1.141362 |
| 10 | 1 | 0 | 5.327650  | -1.840971 | 0.465852  |
| 11 | 1 | 0 | 7.669420  | -1.998477 | 1.297842  |
| 12 | 6 | 0 | 4.196085  | 0.267727  | -0.862434 |
| 13 | 8 | 0 | 3.830116  | 1.219868  | -1.542839 |
| 14 | 7 | 0 | 3.346598  | -0.803834 | -0.541041 |
| 15 | 6 | 0 | 2.151042  | -0.608415 | -0.092714 |
| 16 | 6 | 0 | 1.592386  | 0.684542  | 0.327234  |
| 17 | 6 | 0 | 1.287580  | -1.778188 | 0.089174  |
| 18 | 6 | 0 | 0.320323  | 0.792995  | 0.736240  |
| 19 | 1 | 0 | 2.243324  | 1.549962  | 0.307961  |
| 20 | 6 | 0 | 0.012571  | -1.667114 | 0.486520  |
| 21 | 1 | 0 | 1.741205  | -2.744249 | -0.108629 |
| 22 | 6 | 0 | -0.663639 | -0.347046 | 0.748355  |
| 23 | 1 | 0 | -0.050065 | 1.755734  | 1.080529  |
| 24 | 1 | 0 | -0.588021 | -2.561453 | 0.632762  |
| 25 | 6 | 0 | -1.412800 | -0.389283 | 2.094941  |
| 26 | 1 | 0 | -0.699876 | -0.563379 | 2.905531  |
| 27 | 1 | 0 | -1.928531 | 0.555872  | 2.290220  |
| 28 | 1 | 0 | -2.152098 | -1.195956 | 2.110542  |
| 29 | 8 | 0 | -5.732089 | 0.291162  | 0.568477  |
| 30 | 6 | 0 | -4.623469 | 0.206854  | 0.084927  |
| 31 | 6 | 0 | -3.693586 | 1.361749  | -0.073719 |
| 32 | 6 | 0 | -3.991780 | -1.078450 | -0.331318 |
| 33 | 6 | 0 | -2.383013 | 1.234256  | -0.312344 |
| 34 | 6 | 0 | -2.682941 | -1.219872 | -0.571311 |
| 35 | 6 | 0 | -1.715500 | -0.090799 | -0.460976 |
| 36 | 1 | 0 | -1.773965 | 2.129444  | -0.373553 |
| 37 | 1 | 0 | -2.303756 | -2.202316 | -0.830039 |
| 38 | 1 | 0 | -1.086580 | -0.072357 | -1.360636 |
| 39 | 7 | 0 | -4.248764 | 2.720737  | 0.050246  |
| 40 | 8 | 0 | -3.528923 | 3.573754  | 0.570416  |
| 41 | 8 | 0 | -5.369930 | 2.902713  | -0.403352 |
| 42 | 7 | 0 | -4.856582 | -2.262334 | -0.476599 |
| 43 | 8 | 0 | -5.979061 | -2.075097 | -0.924537 |
| 44 | 8 | 0 | -4.371032 | -3.351144 | -0.167497 |

---

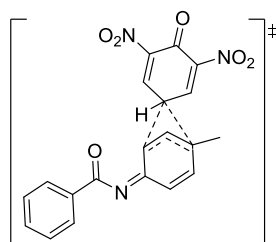**TS-B-2**

Standard orientation:

| Center Number | Atomic Number | Atomic Type | Coordinates (Angstroms) |           |           |
|---------------|---------------|-------------|-------------------------|-----------|-----------|
|               |               |             | X                       | Y         | Z         |
| 1             | 6             | 0           | 7.229374                | -1.208408 | 1.211530  |
| 2             | 6             | 0           | 6.703544                | -1.943877 | 0.144243  |
| 3             | 6             | 0           | 5.406150                | -1.702165 | -0.293223 |
| 4             | 6             | 0           | 4.624591                | -0.721786 | 0.335349  |
| 5             | 6             | 0           | 5.153826                | 0.011996  | 1.407454  |
| 6             | 6             | 0           | 6.454473                | -0.232550 | 1.841680  |
| 7             | 1             | 0           | 8.242727                | -1.399513 | 1.553245  |
| 8             | 1             | 0           | 7.307456                | -2.704301 | -0.341928 |
| 9             | 1             | 0           | 4.974668                | -2.259948 | -1.117420 |
| 10            | 1             | 0           | 4.535107                | 0.756175  | 1.895796  |
| 11            | 1             | 0           | 6.862212                | 0.332185  | 2.674832  |
| 12            | 6             | 0           | 3.253673                | -0.478442 | -0.180038 |
| 13            | 8             | 0           | 2.720806                | -1.195920 | -1.025856 |
| 14            | 7             | 0           | 2.583317                | 0.588550  | 0.429220  |
| 15            | 6             | 0           | 1.737582                | 1.344020  | -0.242830 |
| 16            | 6             | 0           | 1.586360                | 1.377007  | -1.684555 |
| 17            | 6             | 0           | 0.914344                | 2.248613  | 0.527436  |
| 18            | 6             | 0           | 0.670016                | 2.217388  | -2.263359 |
| 19            | 1             | 0           | 2.193409                | 0.714905  | -2.286958 |
| 20            | 6             | 0           | 0.014296                | 3.089995  | -0.083249 |
| 21            | 1             | 0           | 1.040362                | 2.231246  | 1.604512  |
| 22            | 6             | 0           | -0.156547               | 3.074330  | -1.485758 |
| 23            | 1             | 0           | 0.555145                | 2.225923  | -3.343757 |
| 24            | 1             | 0           | -0.596768               | 3.760121  | 0.514901  |
| 25            | 6             | 0           | -1.143217               | 3.986130  | -2.147720 |
| 26            | 1             | 0           | -0.655327               | 4.929976  | -2.432116 |
| 27            | 1             | 0           | -1.546488               | 3.543504  | -3.063425 |
| 28            | 1             | 0           | -1.972132               | 4.235547  | -1.479332 |
| 29            | 8             | 0           | -5.112301               | -1.489672 | 0.752105  |
| 30            | 6             | 0           | -4.006291               | -1.042974 | 0.461967  |
| 31            | 6             | 0           | -3.099255               | -1.701829 | -0.506430 |
| 32            | 6             | 0           | -3.472539               | 0.248090  | 0.937329  |



|    |   |   |           |           |           |
|----|---|---|-----------|-----------|-----------|
| 33 | 6 | 0 | -1.955002 | -1.126122 | -0.991000 |
| 34 | 6 | 0 | -2.316995 | 0.804979  | 0.450604  |
| 35 | 6 | 0 | -1.550835 | 0.140504  | -0.523530 |
| 36 | 1 | 0 | -1.367708 | -1.653842 | -1.734237 |
| 37 | 1 | 0 | -2.015355 | 1.772903  | 0.824965  |
| 38 | 1 | 0 | -0.651691 | 0.582837  | -0.913493 |
| 39 | 7 | 0 | -3.453082 | -3.031049 | -0.998416 |
| 40 | 8 | 0 | -3.255527 | -3.255630 | -2.195492 |
| 41 | 8 | 0 | -3.887812 | -3.834359 | -0.182206 |
| 42 | 7 | 0 | -4.198696 | 1.003580  | 1.953518  |
| 43 | 8 | 0 | -4.855560 | 0.377081  | 2.776173  |
| 44 | 8 | 0 | -4.073567 | 2.235415  | 1.932622  |

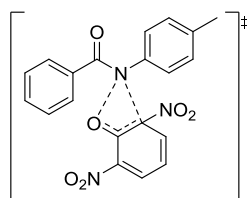

TS-C-1

Standard orientation:

| Center Number | Atomic Number | Atomic Type | Coordinates (Angstroms) |           |           |
|---------------|---------------|-------------|-------------------------|-----------|-----------|
|               |               |             | X                       | Y         | Z         |
| 1             | 6             | 0           | 4.124895                | -2.048780 | 1.432190  |
| 2             | 6             | 0           | 2.889908                | -1.688845 | 1.973888  |
| 3             | 6             | 0           | 1.801691                | -1.464839 | 1.133408  |
| 4             | 6             | 0           | 1.946607                | -1.616341 | -0.251839 |
| 5             | 6             | 0           | 3.185417                | -1.985423 | -0.791724 |
| 6             | 6             | 0           | 4.271891                | -2.194573 | 0.049872  |
| 7             | 1             | 0           | 4.976720                | -2.209177 | 2.086808  |
| 8             | 1             | 0           | 2.777183                | -1.575772 | 3.048236  |
| 9             | 1             | 0           | 0.845650                | -1.163913 | 1.548954  |
| 10            | 1             | 0           | 3.275248                | -2.077279 | -1.868131 |
| 11            | 1             | 0           | 5.237557                | -2.460153 | -0.369124 |
| 12            | 6             | 0           | 0.808135                | -1.405749 | -1.179389 |
| 13            | 8             | 0           | 0.776559                | -1.797500 | -2.333792 |
| 14            | 7             | 0           | -0.278855               | -0.663868 | -0.666207 |
| 15            | 6             | 0           | -1.402774               | -1.289563 | -0.355915 |
| 16            | 6             | 0           | -1.597350               | -2.717448 | -0.470323 |
| 17            | 6             | 0           | -2.503278               | -0.502041 | 0.133532  |
| 18            | 6             | 0           | -2.804989               | -3.278986 | -0.142969 |

|    |   |   |           |           |           |
|----|---|---|-----------|-----------|-----------|
| 19 | 1 | 0 | -0.787452 | -3.327314 | -0.853079 |
| 20 | 6 | 0 | -3.703991 | -1.092898 | 0.451839  |
| 21 | 1 | 0 | -2.368946 | 0.564072  | 0.252037  |
| 22 | 6 | 0 | -3.885421 | -2.485281 | 0.320620  |
| 23 | 1 | 0 | -2.946909 | -4.351616 | -0.241953 |
| 24 | 1 | 0 | -4.522586 | -0.477887 | 0.813148  |
| 25 | 6 | 0 | -5.201889 | -3.124222 | 0.641779  |
| 26 | 1 | 0 | -5.829730 | -2.474320 | 1.256720  |
| 27 | 1 | 0 | -5.752619 | -3.337303 | -0.285608 |
| 28 | 1 | 0 | -5.067069 | -4.081378 | 1.157294  |
| 29 | 8 | 0 | -0.016991 | 2.115878  | -1.802907 |
| 30 | 6 | 0 | 0.139570  | 2.197707  | -0.583721 |
| 31 | 6 | 0 | -0.927054 | 2.647356  | 0.326212  |
| 32 | 6 | 0 | 1.358784  | 1.819392  | 0.150033  |
| 33 | 6 | 0 | -0.832091 | 2.631627  | 1.697864  |
| 34 | 6 | 0 | 1.458561  | 1.866336  | 1.531058  |
| 35 | 6 | 0 | 0.369886  | 2.247640  | 2.314361  |
| 36 | 1 | 0 | -1.689976 | 2.935520  | 2.287940  |
| 37 | 1 | 0 | 2.400247  | 1.579431  | 1.981904  |
| 38 | 1 | 0 | 0.454295  | 2.261731  | 3.395323  |
| 39 | 7 | 0 | -2.182855 | 3.103638  | -0.250893 |
| 40 | 8 | 0 | -3.226732 | 2.719322  | 0.306004  |
| 41 | 8 | 0 | -2.142087 | 3.840109  | -1.225945 |
| 42 | 7 | 0 | 2.544541  | 1.386303  | -0.574867 |
| 43 | 8 | 0 | 2.410487  | 0.954683  | -1.717955 |
| 44 | 8 | 0 | 3.628705  | 1.457813  | 0.018177  |

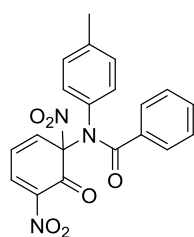**Int-C-1**

Standard orientation:

| Center Number | Atomic Number | Atomic Type | Coordinates (Angstroms) |           |           |
|---------------|---------------|-------------|-------------------------|-----------|-----------|
|               |               |             | X                       | Y         | Z         |
| 1             | 6             | 0           | 4.120161                | -2.861025 | -0.139834 |
| 2             | 6             | 0           | 3.790635                | -2.120476 | -1.277154 |
| 3             | 6             | 0           | 2.476431                | -1.714676 | -1.491699 |

|    |   |   |           |           |           |
|----|---|---|-----------|-----------|-----------|
| 4  | 6 | 0 | 1.489147  | -2.025607 | -0.549830 |
| 5  | 6 | 0 | 1.814853  | -2.788302 | 0.576981  |
| 6  | 6 | 0 | 3.129785  | -3.202611 | 0.781109  |
| 7  | 1 | 0 | 5.147201  | -3.173396 | 0.026208  |
| 8  | 1 | 0 | 4.558789  | -1.857839 | -1.998363 |
| 9  | 1 | 0 | 2.210222  | -1.140416 | -2.370923 |
| 10 | 1 | 0 | 1.043903  | -3.046359 | 1.294800  |
| 11 | 1 | 0 | 3.378909  | -3.788574 | 1.660773  |
| 12 | 6 | 0 | 0.057001  | -1.676993 | -0.818753 |
| 13 | 8 | 0 | -0.575434 | -2.193655 | -1.716403 |
| 14 | 7 | 0 | -0.602383 | -0.818834 | 0.109021  |
| 15 | 6 | 0 | -2.032854 | -0.706641 | -0.074880 |
| 16 | 6 | 0 | -2.876858 | -1.499165 | 0.700399  |
| 17 | 6 | 0 | -2.567291 | 0.187150  | -1.003854 |
| 18 | 6 | 0 | -4.257650 | -1.383863 | 0.556339  |
| 19 | 1 | 0 | -2.442388 | -2.192309 | 1.414063  |
| 20 | 6 | 0 | -3.948689 | 0.297283  | -1.136906 |
| 21 | 1 | 0 | -1.902205 | 0.776453  | -1.626445 |
| 22 | 6 | 0 | -4.815208 | -0.485714 | -0.362909 |
| 23 | 1 | 0 | -4.912917 | -1.999339 | 1.167124  |
| 24 | 1 | 0 | -4.361708 | 0.995430  | -1.860277 |
| 25 | 6 | 0 | -6.310231 | -0.387713 | -0.539519 |
| 26 | 1 | 0 | -6.656468 | -1.069275 | -1.327207 |
| 27 | 1 | 0 | -6.840865 | -0.655234 | 0.379758  |
| 28 | 1 | 0 | -6.614322 | 0.623664  | -0.827915 |
| 29 | 8 | 0 | 0.928005  | 0.833114  | -1.491216 |
| 30 | 6 | 0 | 0.704489  | 1.254347  | -0.378573 |
| 31 | 6 | 0 | 0.876560  | 2.666471  | 0.019380  |
| 32 | 6 | 0 | 0.031163  | 0.330649  | 0.688483  |
| 33 | 6 | 0 | 0.105027  | 3.211360  | 0.982019  |
| 34 | 6 | 0 | -0.899589 | 1.075439  | 1.614846  |
| 35 | 6 | 0 | -0.822978 | 2.408596  | 1.757709  |
| 36 | 1 | 0 | 0.180385  | 4.278062  | 1.163787  |
| 37 | 1 | 0 | -1.550084 | 0.465689  | 2.228311  |
| 38 | 1 | 0 | -1.454382 | 2.914916  | 2.479973  |
| 39 | 7 | 0 | 1.813584  | 3.518960  | -0.718419 |
| 40 | 8 | 0 | 1.642946  | 4.737768  | -0.648685 |
| 41 | 8 | 0 | 2.721978  | 2.959908  | -1.320715 |
| 42 | 7 | 0 | 1.190826  | -0.098246 | 1.682055  |
| 43 | 8 | 0 | 2.285400  | 0.414326  | 1.500733  |
| 44 | 8 | 0 | 0.874391  | -0.853422 | 2.584739  |

---

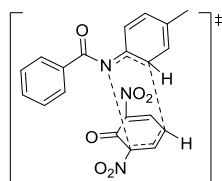

TS-C-2

Standard orientation:

| Center Number | Atomic Number | Atomic Type | Coordinates (Angstroms) |           |           |
|---------------|---------------|-------------|-------------------------|-----------|-----------|
|               |               |             | X                       | Y         | Z         |
| 1             | 6             | 0           | -4.670396               | -0.919485 | -0.814190 |
| 2             | 6             | 0           | -3.876059               | 0.070734  | -1.394859 |
| 3             | 6             | 0           | -2.513094               | -0.146729 | -1.567197 |
| 4             | 6             | 0           | -1.938139               | -1.358189 | -1.155390 |
| 5             | 6             | 0           | -2.743867               | -2.357336 | -0.589313 |
| 6             | 6             | 0           | -4.104488               | -2.134848 | -0.416641 |
| 7             | 1             | 0           | -5.731890               | -0.743254 | -0.665027 |
| 8             | 1             | 0           | -4.310521               | 1.018749  | -1.696312 |
| 9             | 1             | 0           | -1.885062               | 0.614998  | -2.010720 |
| 10            | 1             | 0           | -2.280963               | -3.287865 | -0.278902 |
| 11            | 1             | 0           | -4.725342               | -2.900345 | 0.039123  |
| 12            | 6             | 0           | -0.485865               | -1.611604 | -1.286209 |
| 13            | 8             | 0           | -0.002999               | -2.738816 | -1.303075 |
| 14            | 7             | 0           | 0.271043                | -0.422360 | -1.438511 |
| 15            | 6             | 0           | 1.545855                | -0.371347 | -1.147356 |
| 16            | 6             | 0           | 2.210727                | 0.902153  | -1.420435 |
| 17            | 6             | 0           | 2.361040                | -1.406564 | -0.530358 |
| 18            | 6             | 0           | 3.628586                | 0.984824  | -1.398378 |
| 19            | 6             | 0           | 3.708138                | -1.240505 | -0.439852 |
| 20            | 1             | 0           | 1.881825                | -2.309644 | -0.184713 |
| 21            | 6             | 0           | 4.382177                | -0.057247 | -0.914697 |
| 22            | 1             | 0           | 4.110163                | 1.895194  | -1.744388 |
| 23            | 1             | 0           | 4.311388                | -2.030887 | -0.000715 |
| 24            | 6             | 0           | 5.881579                | -0.002830 | -0.861167 |
| 25            | 1             | 0           | 6.321463                | -0.811627 | -1.457957 |
| 26            | 1             | 0           | 6.267347                | 0.948910  | -1.235857 |
| 27            | 1             | 0           | 6.239562                | -0.140289 | 0.167175  |
| 28            | 8             | 0           | -1.891828               | 0.076383  | 1.586873  |
| 29            | 6             | 0           | -0.853486               | 0.673733  | 1.354912  |
| 30            | 6             | 0           | 0.483046                | 0.241687  | 1.822473  |
| 31            | 6             | 0           | -0.768120               | 1.880244  | 0.490503  |
| 32            | 6             | 0           | 1.648053                | 0.837339  | 1.452154  |
| 33            | 6             | 0           | 0.395843                | 2.477956  | 0.127513  |

|    |   |   |           |           |           |
|----|---|---|-----------|-----------|-----------|
| 34 | 6 | 0 | 1.649752  | 1.926607  | 0.524246  |
| 35 | 1 | 0 | 2.584630  | 0.449165  | 1.833112  |
| 36 | 1 | 0 | 0.361018  | 3.357999  | -0.505463 |
| 37 | 7 | 0 | 0.576445  | -0.912688 | 2.714622  |
| 38 | 8 | 0 | 1.564118  | -1.646340 | 2.572928  |
| 39 | 8 | 0 | -0.306596 | -1.070663 | 3.546466  |
| 40 | 7 | 0 | -2.010980 | 2.510013  | 0.040475  |
| 41 | 8 | 0 | -2.955563 | 2.518463  | 0.817415  |
| 42 | 8 | 0 | -2.009133 | 3.013810  | -1.088619 |
| 43 | 1 | 0 | 2.532885  | 2.548705  | 0.458798  |
| 44 | 1 | 0 | 1.636267  | 1.611191  | -2.004706 |

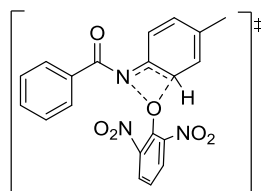

**TS-D-1**

Standard orientation:

| Center Number | Atomic Number | Atomic Type | Coordinates (Angstroms) |           |           |
|---------------|---------------|-------------|-------------------------|-----------|-----------|
|               |               |             | X                       | Y         | Z         |
| 1             | 6             | 0           | -3.648634               | 2.464511  | 0.270955  |
| 2             | 6             | 0           | -3.125429               | 1.561671  | -0.656422 |
| 3             | 6             | 0           | -1.774426               | 1.606146  | -0.991852 |
| 4             | 6             | 0           | -0.942966               | 2.561320  | -0.390761 |
| 5             | 6             | 0           | -1.470589               | 3.474682  | 0.533135  |
| 6             | 6             | 0           | -2.820078               | 3.423058  | 0.864108  |
| 7             | 1             | 0           | -4.702489               | 2.424727  | 0.533117  |
| 8             | 1             | 0           | -3.765025               | 0.819230  | -1.124263 |
| 9             | 1             | 0           | -1.366021               | 0.896903  | -1.698903 |
| 10            | 1             | 0           | -0.807495               | 4.206339  | 0.982283  |
| 11            | 1             | 0           | -3.229121               | 4.125977  | 1.584064  |
| 12            | 6             | 0           | 0.506204                | 2.632377  | -0.680423 |
| 13            | 8             | 0           | 1.220306                | 3.589229  | -0.403356 |
| 14            | 7             | 0           | 1.024178                | 1.536058  | -1.399140 |
| 15            | 6             | 0           | 2.083941                | 0.880304  | -1.006456 |
| 16            | 6             | 0           | 2.833493                | 1.136593  | 0.209271  |
| 17            | 6             | 0           | 2.472750                | -0.251724 | -1.821492 |
| 18            | 6             | 0           | 3.891879                | 0.327904  | 0.537564  |
| 19            | 1             | 0           | 2.578603                | 2.000020  | 0.804702  |

|    |   |   |           |           |           |
|----|---|---|-----------|-----------|-----------|
| 20 | 6 | 0 | 3.528061  | -1.047219 | -1.454211 |
| 21 | 1 | 0 | 1.875964  | -0.445117 | -2.704124 |
| 22 | 6 | 0 | 4.251387  | -0.777612 | -0.269993 |
| 23 | 1 | 0 | 4.461589  | 0.525655  | 1.440553  |
| 24 | 1 | 0 | 3.806534  | -1.903183 | -2.061227 |
| 25 | 6 | 0 | 5.375111  | -1.673487 | 0.151821  |
| 26 | 1 | 0 | 5.014311  | -2.386627 | 0.907014  |
| 27 | 1 | 0 | 5.772941  | -2.252053 | -0.686177 |
| 28 | 1 | 0 | 6.188512  | -1.105181 | 0.614370  |
| 29 | 8 | 0 | 0.145048  | -0.799670 | -0.649467 |
| 30 | 6 | 0 | -0.704692 | -1.311844 | 0.114392  |
| 31 | 6 | 0 | -1.843687 | -2.098702 | -0.333856 |
| 32 | 6 | 0 | -0.604920 | -1.249171 | 1.565117  |
| 33 | 6 | 0 | -2.688520 | -2.768863 | 0.532508  |
| 34 | 6 | 0 | -1.445627 | -1.938520 | 2.426179  |
| 35 | 6 | 0 | -2.501947 | -2.690506 | 1.916716  |
| 36 | 1 | 0 | -3.496490 | -3.355671 | 0.111263  |
| 37 | 1 | 0 | -1.270582 | -1.864697 | 3.493681  |
| 38 | 1 | 0 | -3.177744 | -3.209246 | 2.587196  |
| 39 | 7 | 0 | -2.119636 | -2.231006 | -1.759009 |
| 40 | 8 | 0 | -2.677538 | -3.268528 | -2.133360 |
| 41 | 8 | 0 | -1.806671 | -1.307669 | -2.511751 |
| 42 | 7 | 0 | 0.436361  | -0.446682 | 2.164886  |
| 43 | 8 | 0 | 0.691371  | 0.647409  | 1.646082  |
| 44 | 8 | 0 | 0.990273  | -0.867166 | 3.185789  |

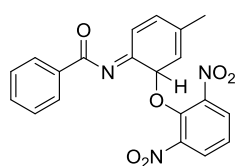

**Int-D-1**

Standard orientation:

| Center Number | Atomic Number | Atomic Type | Coordinates (Angstroms) |           |           |
|---------------|---------------|-------------|-------------------------|-----------|-----------|
|               |               |             | X                       | Y         | Z         |
| 1             | 6             | 0           | -4.984351               | -2.157062 | 1.372491  |
| 2             | 6             | 0           | -3.608852               | -2.235510 | 1.147473  |
| 3             | 6             | 0           | -2.996015               | -1.365666 | 0.247728  |
| 4             | 6             | 0           | -3.765174               | -0.406906 | -0.425792 |
| 5             | 6             | 0           | -5.145519               | -0.329137 | -0.196358 |

|    |   |   |           |           |           |
|----|---|---|-----------|-----------|-----------|
| 6  | 6 | 0 | -5.753036 | -1.203159 | 0.698905  |
| 7  | 1 | 0 | -5.458921 | -2.838469 | 2.073372  |
| 8  | 1 | 0 | -3.011949 | -2.975199 | 1.672973  |
| 9  | 1 | 0 | -1.928167 | -1.423687 | 0.071347  |
| 10 | 1 | 0 | -5.715891 | 0.424493  | -0.728892 |
| 11 | 1 | 0 | -6.823273 | -1.143172 | 0.874922  |
| 12 | 6 | 0 | -3.155132 | 0.576372  | -1.365521 |
| 13 | 8 | 0 | -3.792356 | 1.452051  | -1.930249 |
| 14 | 7 | 0 | -1.790872 | 0.373246  | -1.631663 |
| 15 | 6 | 0 | -0.869195 | 1.071417  | -1.085947 |
| 16 | 6 | 0 | -1.076547 | 2.160340  | -0.134291 |
| 17 | 6 | 0 | 0.561685  | 0.678049  | -1.420617 |
| 18 | 6 | 0 | -0.044495 | 2.944135  | 0.235013  |
| 19 | 1 | 0 | -2.080999 | 2.334420  | 0.234977  |
| 20 | 6 | 0 | 1.590783  | 1.699284  | -1.075367 |
| 21 | 1 | 0 | 0.622420  | 0.373062  | -2.464670 |
| 22 | 6 | 0 | 1.318229  | 2.746222  | -0.273775 |
| 23 | 1 | 0 | -0.206409 | 3.762136  | 0.931276  |
| 24 | 1 | 0 | 2.591595  | 1.533781  | -1.462795 |
| 25 | 6 | 0 | 2.366645  | 3.732811  | 0.156232  |
| 26 | 1 | 0 | 2.078289  | 4.758318  | -0.105174 |
| 27 | 1 | 0 | 2.482495  | 3.697514  | 1.247095  |
| 28 | 1 | 0 | 3.335679  | 3.518189  | -0.302235 |
| 29 | 8 | 0 | 0.786423  | -0.602881 | -0.673461 |
| 30 | 6 | 0 | 1.865163  | -0.737165 | 0.118918  |
| 31 | 6 | 0 | 3.017643  | -1.409140 | -0.324112 |
| 32 | 6 | 0 | 1.901693  | -0.282047 | 1.449586  |
| 33 | 6 | 0 | 4.103483  | -1.672504 | 0.506976  |
| 34 | 6 | 0 | 3.004281  | -0.471712 | 2.277309  |
| 35 | 6 | 0 | 4.103062  | -1.188802 | 1.811695  |
| 36 | 1 | 0 | 4.939588  | -2.234580 | 0.108240  |
| 37 | 1 | 0 | 2.977605  | -0.063605 | 3.280901  |
| 38 | 1 | 0 | 4.953757  | -1.365873 | 2.460209  |
| 39 | 7 | 0 | 3.126502  | -1.837434 | -1.723837 |
| 40 | 8 | 0 | 3.698424  | -2.903278 | -1.938156 |
| 41 | 8 | 0 | 2.680698  | -1.085840 | -2.588640 |
| 42 | 7 | 0 | 0.752160  | 0.423125  | 2.025891  |
| 43 | 8 | 0 | -0.368670 | -0.017849 | 1.797662  |
| 44 | 8 | 0 | 0.998424  | 1.411697  | 2.719399  |

---

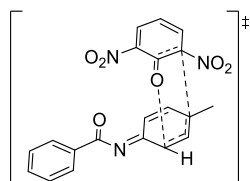

TS-D-2

Standard orientation:

| Center Number | Atomic Number | Atomic Type | Coordinates (Angstroms) |           |           |
|---------------|---------------|-------------|-------------------------|-----------|-----------|
|               |               |             | X                       | Y         | Z         |
| 1             | 6             | 0           | 4.933884                | 1.533333  | -0.397857 |
| 2             | 6             | 0           | 3.661211                | 1.405077  | -0.955112 |
| 3             | 6             | 0           | 2.955206                | 0.211469  | -0.813824 |
| 4             | 6             | 0           | 3.521801                | -0.851562 | -0.096517 |
| 5             | 6             | 0           | 4.799034                | -0.715512 | 0.467381  |
| 6             | 6             | 0           | 5.504775                | 0.471561  | 0.310753  |
| 7             | 1             | 0           | 5.481003                | 2.465219  | -0.510384 |
| 8             | 1             | 0           | 3.202258                | 2.235007  | -1.479968 |
| 9             | 1             | 0           | 1.967138                | 0.118196  | -1.253250 |
| 10            | 1             | 0           | 5.210243                | -1.550721 | 1.024163  |
| 11            | 1             | 0           | 6.495461                | 0.575187  | 0.744110  |
| 12            | 6             | 0           | 2.790443                | -2.121697 | 0.148945  |
| 13            | 8             | 0           | 3.184340                | -2.993650 | 0.909565  |
| 14            | 7             | 0           | 1.627984                | -2.330635 | -0.613801 |
| 15            | 6             | 0           | 0.451992                | -2.052800 | -0.169439 |
| 16            | 6             | 0           | 0.175507                | -1.415184 | 1.122977  |
| 17            | 6             | 0           | -0.702695               | -2.390192 | -1.000414 |
| 18            | 6             | 0           | -1.082553               | -1.114688 | 1.490427  |
| 19            | 1             | 0           | 1.015105                | -1.196783 | 1.774617  |
| 20            | 6             | 0           | -1.964827               | -2.127732 | -0.602558 |
| 21            | 1             | 0           | -0.493310               | -2.902393 | -1.933099 |
| 22            | 6             | 0           | -2.248140               | -1.409994 | 0.635003  |
| 23            | 1             | 0           | -1.280605               | -0.638181 | 2.446145  |
| 24            | 1             | 0           | -2.805928               | -2.429833 | -1.218130 |
| 25            | 6             | 0           | -3.492010               | -1.848625 | 1.381398  |
| 26            | 1             | 0           | -3.328202               | -2.876388 | 1.727504  |
| 27            | 1             | 0           | -3.675555               | -1.224163 | 2.259158  |
| 28            | 1             | 0           | -4.376825               | -1.838952 | 0.741869  |
| 29            | 8             | 0           | -0.804037               | 0.443466  | -1.503248 |
| 30            | 6             | 0           | -1.381058               | 0.936578  | -0.546254 |
| 31            | 6             | 0           | -2.734110               | 0.457289  | -0.062531 |
| 32            | 6             | 0           | -0.764980               | 1.943910  | 0.339649  |
| 33            | 6             | 0           | -3.362169               | 1.125795  | 1.063210  |



|    |   |   |           |           |           |
|----|---|---|-----------|-----------|-----------|
| 34 | 6 | 0 | -1.350480 | 2.408444  | 1.472368  |
| 35 | 6 | 0 | -2.674319 | 2.001171  | 1.839122  |
| 36 | 1 | 0 | -4.396959 | 0.883950  | 1.266168  |
| 37 | 1 | 0 | -0.813491 | 3.132268  | 2.076431  |
| 38 | 1 | 0 | -3.143149 | 2.453982  | 2.705971  |
| 39 | 7 | 0 | -3.720126 | 0.086491  | -1.122239 |
| 40 | 8 | 0 | -4.885139 | -0.101197 | -0.748913 |
| 41 | 8 | 0 | -3.335355 | -0.045465 | -2.273842 |
| 42 | 7 | 0 | 0.528815  | 2.509176  | -0.034260 |
| 43 | 8 | 0 | 0.733552  | 2.706797  | -1.228986 |
| 44 | 8 | 0 | 1.315019  | 2.772366  | 0.877977  |

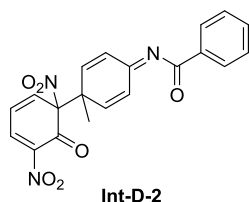

Standard orientation:

| Center Number | Atomic Number | Atomic Type | Coordinates (Angstroms) |           |           |
|---------------|---------------|-------------|-------------------------|-----------|-----------|
|               |               |             | X                       | Y         | Z         |
| 1             | 6             | 0           | 4.718887                | 1.759956  | -0.261105 |
| 2             | 6             | 0           | 3.486603                | 1.529130  | -0.874000 |
| 3             | 6             | 0           | 2.903838                | 0.263949  | -0.813504 |
| 4             | 6             | 0           | 3.551690                | -0.772925 | -0.126607 |
| 5             | 6             | 0           | 4.789400                | -0.533645 | 0.487501  |
| 6             | 6             | 0           | 5.372562                | 0.726656  | 0.416258  |
| 7             | 1             | 0           | 5.169018                | 2.747617  | -0.308834 |
| 8             | 1             | 0           | 2.967395                | 2.332912  | -1.384008 |
| 9             | 1             | 0           | 1.949692                | 0.089549  | -1.300058 |
| 10            | 1             | 0           | 5.266944                | -1.350550 | 1.017804  |
| 11            | 1             | 0           | 6.332316                | 0.907963  | 0.891872  |
| 12            | 6             | 0           | 2.948886                | -2.128324 | 0.039718  |
| 13            | 8             | 0           | 3.446373                | -2.992298 | 0.747072  |
| 14            | 7             | 0           | 1.803090                | -2.394136 | -0.722741 |
| 15            | 6             | 0           | 0.617401                | -2.159789 | -0.286199 |
| 16            | 6             | 0           | 0.316489                | -1.562276 | 1.023969  |
| 17            | 6             | 0           | -0.533205               | -2.478278 | -1.131455 |
| 18            | 6             | 0           | -0.928073               | -1.204999 | 1.362016  |
| 19            | 1             | 0           | 1.140941                | -1.418587 | 1.715367  |
| 20            | 6             | 0           | -1.781185               | -2.110915 | -0.810467 |

|    |   |   |           |           |           |
|----|---|---|-----------|-----------|-----------|
| 21 | 1 | 0 | -0.320436 | -3.009112 | -2.053670 |
| 22 | 6 | 0 | -2.134639 | -1.389917 | 0.465412  |
| 23 | 1 | 0 | -1.120564 | -0.763614 | 2.336536  |
| 24 | 1 | 0 | -2.606334 | -2.343695 | -1.473088 |
| 25 | 6 | 0 | -3.184493 | -2.219264 | 1.247550  |
| 26 | 1 | 0 | -3.397470 | -1.770603 | 2.222872  |
| 27 | 1 | 0 | -4.113336 | -2.315717 | 0.684706  |
| 28 | 1 | 0 | -2.771429 | -3.216274 | 1.421448  |
| 29 | 8 | 0 | -1.085673 | 0.533070  | -1.601491 |
| 30 | 6 | 0 | -1.471431 | 0.867665  | -0.502592 |
| 31 | 6 | 0 | -2.655785 | 0.093201  | 0.147021  |
| 32 | 6 | 0 | -0.862404 | 1.914508  | 0.340358  |
| 33 | 6 | 0 | -3.258489 | 0.734029  | 1.361211  |
| 34 | 6 | 0 | -1.414304 | 2.312619  | 1.508437  |
| 35 | 6 | 0 | -2.648628 | 1.744373  | 2.003960  |
| 36 | 1 | 0 | -4.206543 | 0.337692  | 1.710023  |
| 37 | 1 | 0 | -0.924390 | 3.102911  | 2.067294  |
| 38 | 1 | 0 | -3.085938 | 2.170887  | 2.900737  |
| 39 | 7 | 0 | -3.788264 | 0.138473  | -0.908635 |
| 40 | 8 | 0 | -3.982865 | 1.242565  | -1.396538 |
| 41 | 8 | 0 | -4.441901 | -0.868936 | -1.139421 |
| 42 | 7 | 0 | 0.338992  | 2.618011  | -0.119424 |
| 43 | 8 | 0 | 0.505816  | 2.723948  | -1.329982 |
| 44 | 8 | 0 | 1.088838  | 3.067609  | 0.748073  |

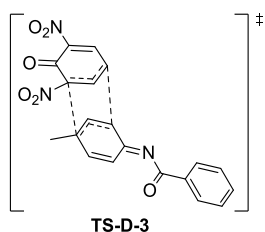

Standard orientation:

| Center Number | Atomic Number | Atomic Type | Coordinates (Angstroms) |           |           |
|---------------|---------------|-------------|-------------------------|-----------|-----------|
|               |               |             | X                       | Y         | Z         |
| 1             | 6             | 0           | 5.938305                | 1.590628  | 1.436116  |
| 2             | 6             | 0           | 4.787275                | 2.221891  | 0.960216  |
| 3             | 6             | 0           | 3.937419                | 1.551092  | 0.083679  |
| 4             | 6             | 0           | 4.237001                | 0.242632  | -0.320994 |
| 5             | 6             | 0           | 5.397725                | -0.383721 | 0.154282  |

|    |   |   |            |            |            |
|----|---|---|------------|------------|------------|
| 6  | 6 | 0 | 6. 243401  | 0. 287963  | 1. 030800  |
| 7  | 1 | 0 | 6. 599914  | 2. 114410  | 2. 120197  |
| 8  | 1 | 0 | 4. 556768  | 3. 237640  | 1. 267920  |
| 9  | 1 | 0 | 3. 052750  | 2. 038922  | -0. 310215 |
| 10 | 1 | 0 | 5. 611903  | -1. 394848 | -0. 174830 |
| 11 | 1 | 0 | 7. 140434  | -0. 200340 | 1. 399858  |
| 12 | 6 | 0 | 3. 342950  | -0. 531911 | -1. 224588 |
| 13 | 8 | 0 | 3. 656750  | -1. 611667 | -1. 706815 |
| 14 | 7 | 0 | 2. 123603  | 0. 104903  | -1. 522496 |
| 15 | 6 | 0 | 0. 994043  | -0. 511175 | -1. 391826 |
| 16 | 6 | 0 | 0. 794042  | -1. 837651 | -0. 814615 |
| 17 | 6 | 0 | -0. 232712 | 0. 228656  | -1. 780032 |
| 18 | 6 | 0 | -0. 438760 | -2. 396080 | -0. 804350 |
| 19 | 1 | 0 | 1. 650102  | -2. 363669 | -0. 412186 |
| 20 | 6 | 0 | -1. 454943 | -0. 491210 | -1. 928057 |
| 21 | 1 | 0 | -0. 051144 | 1. 092383  | -2. 412477 |
| 22 | 6 | 0 | -1. 600278 | -1. 745265 | -1. 391790 |
| 23 | 1 | 0 | -0. 580726 | -3. 372496 | -0. 350951 |
| 24 | 1 | 0 | -2. 305176 | 0. 007554  | -2. 381850 |
| 25 | 6 | 0 | -2. 915781 | -2. 459654 | -1. 390830 |
| 26 | 1 | 0 | -2. 791996 | -3. 533058 | -1. 567222 |
| 27 | 1 | 0 | -3. 405025 | -2. 334185 | -0. 412242 |
| 28 | 1 | 0 | -3. 595639 | -2. 049336 | -2. 141998 |
| 29 | 8 | 0 | -4. 000761 | -0. 510932 | 0. 937269  |
| 30 | 6 | 0 | -2. 981365 | 0. 157321  | 0. 835065  |
| 31 | 6 | 0 | -1. 659188 | -0. 239391 | 1. 370528  |
| 32 | 6 | 0 | -2. 912703 | 1. 423761  | 0. 062089  |
| 33 | 6 | 0 | -0. 495913 | 0. 348642  | 0. 990690  |
| 34 | 6 | 0 | -1. 754965 | 1. 997786  | -0. 331060 |
| 35 | 6 | 0 | -0. 494875 | 1. 357371  | -0. 031033 |
| 36 | 1 | 0 | 0. 439313  | -0. 010178 | 1. 402662  |
| 37 | 1 | 0 | -1. 779895 | 2. 880254  | -0. 961745 |
| 38 | 1 | 0 | 0. 416275  | 1. 930465  | -0. 167017 |
| 39 | 7 | 0 | -1. 587523 | -1. 333161 | 2. 342057  |
| 40 | 8 | 0 | -0. 543819 | -1. 996058 | 2. 364957  |
| 41 | 8 | 0 | -2. 552173 | -1. 510793 | 3. 074816  |
| 42 | 7 | 0 | -4. 172279 | 2. 036140  | -0. 365426 |
| 43 | 8 | 0 | -5. 087033 | 2. 065348  | 0. 446534  |
| 44 | 8 | 0 | -4. 209030 | 2. 493002  | -1. 512082 |

---
